# Supplementary material
Source: Elsevier journal article supplement (https://rcastoragev2.blob.core.windows.net/d01263d08d750a5bf4f598a9bc0c7833/mmc1.pdf)
Supplement: mmc1 [file mmc1.pdf]

# THE LANCET

## Public Health

### **Supplementary appendix 1**

This appendix formed part of the original submission and has been peer reviewed.  
We post it as supplied by the authors.

Supplement to: GBD 2021 Japan Collaborators. Three decades of population health changes in Japan, 1990–2021: a subnational analysis for the Global Burden of Disease Study 2021. *Lancet Public Health* 2025; published online March 20. [https://doi.org/10.1016/S2468-2667\(25\)00044-1](https://doi.org/10.1016/S2468-2667(25)00044-1).

## Table of Contents

|                                                                                                                                                                                                                                    |          |
|------------------------------------------------------------------------------------------------------------------------------------------------------------------------------------------------------------------------------------|----------|
| <b>Supplementary Figures .....</b>                                                                                                                                                                                                 | <b>3</b> |
| Figure S1: Comparison of life expectancy across 47 prefectures in Japan in 1990 and 2021 for both sexes .....                                                                                                                      | 3        |
| Figure S2: Comparison of healthy life expectancy across 47 prefectures in Japan in 1990 and 2021 for both sexes .....                                                                                                              | 4        |
| Figure S3: Comparison of healthy life expectancy across 47 prefectures in Japan in 1990 and 2021 for (A) females and (B) males.....                                                                                                | 5        |
| Figure S4: Difference between life expectancy and healthy life expectancy across the 47 prefectures in (A) 1990 and (B) 2021 for both sexes .....                                                                                  | 6        |
| Figure S5: Maps of life expectancy and healthy life expectancy across 47 prefectures in Japan in 1990 and 2021 for both sexes .....                                                                                                | 7        |
| Figure S6: Maps of life expectancy and healthy life expectancy across 47 prefectures in Japan in 1990 and 2021 for females .....                                                                                                   | 8        |
| Figure S7: Maps of life expectancy and healthy life expectancy across 47 prefectures in Japan in 1990 and 2021 for males.....                                                                                                      | 9        |
| Figure S8: Comparison of all-cause age-standardised mortality rates across 47 prefectures in Japan in 1990 and 2021 for both sexes .....                                                                                           | 10       |
| Figure S9: GBD level 3 causes of death in Japan for the years 1990, 2005, 2015, and 2021 for all ages and females, with annualised rates of change (ARC) for age-standardised mortality rates .....                                | 11       |
| Figure S10: GBD level 3 causes of death in Japan for the years 1990, 2005, 2015, and 2021 for all ages and males, with annualised rates of change (ARC) for age-standardised mortality rates .....                                 | 12       |
| Figure S11: Comparison of COVID-19 age-standardised mortality rates across 47 prefectures in Japan in (A) 2020 and (B) 2021 for both sexes .....                                                                                   | 13       |
| Figure S12: GBD level 3 causes of disability-adjusted life years (DALYs) in Japan for the years 1990, 2005, 2015, and 2021 for all ages and both sexes, with annualised rates of change (ARC) for age-standardised DALY rate ..... | 14       |

|                                                                                                                                                                                                                                |    |
|--------------------------------------------------------------------------------------------------------------------------------------------------------------------------------------------------------------------------------|----|
| Figure S13: GBD level 3 causes of disability-adjusted life years (DALYs) in Japan for the years 1990, 2005, 2015, and 2021 for all ages and females, with annualised rates of change (ARC) for age-standardised DALY rate..... | 15 |
|--------------------------------------------------------------------------------------------------------------------------------------------------------------------------------------------------------------------------------|----|

|                                                                                                                                                                                                                             |    |
|-----------------------------------------------------------------------------------------------------------------------------------------------------------------------------------------------------------------------------|----|
| Figure 14: GBD level 3 causes of disability-adjusted life years (DALYs) in Japan for the years 1990, 2005, 2015, and 2021 for all ages and males, with annualised rates of change (ARC) for age-standardised DALY rate..... | 16 |
|-----------------------------------------------------------------------------------------------------------------------------------------------------------------------------------------------------------------------------|----|

|                                                                                                                                                                                                                            |    |
|----------------------------------------------------------------------------------------------------------------------------------------------------------------------------------------------------------------------------|----|
| Figure S15: GBD level 3 risk factors for (A) mortality and (B) DALYs in Japan for the years 1990, 2005, 2015, and 2021 for all ages and both sexes, with annualised rates of change (ARC) for age-standardised rates ..... | 17 |
|----------------------------------------------------------------------------------------------------------------------------------------------------------------------------------------------------------------------------|----|

## **Supplementary Tables .....18**

|                                 |    |
|---------------------------------|----|
| Table S1: GATHER checklist..... | 18 |
|---------------------------------|----|

|                                                                                                                                         |    |
|-----------------------------------------------------------------------------------------------------------------------------------------|----|
| Table S2: Life expectancy and healthy life expectancy at birth (years) in Japan and 47 prefectures, 1990 and 2021, for both sexes ..... | 20 |
|-----------------------------------------------------------------------------------------------------------------------------------------|----|

|                                                                                                                                      |    |
|--------------------------------------------------------------------------------------------------------------------------------------|----|
| Table S3: Life expectancy and healthy life expectancy at birth (years) in Japan and 47 prefectures, 1990 and 2021, for females ..... | 22 |
|--------------------------------------------------------------------------------------------------------------------------------------|----|

|                                                                                                                                   |    |
|-----------------------------------------------------------------------------------------------------------------------------------|----|
| Table S4: Life expectancy and healthy life expectancy at birth (years) in Japan and 47 prefectures, 1990 and 2021, for males..... | 24 |
|-----------------------------------------------------------------------------------------------------------------------------------|----|

|                                                                                                                                                                            |    |
|----------------------------------------------------------------------------------------------------------------------------------------------------------------------------|----|
| Table S5: Age-standardised mortality and DALY rates per 100,000 population in Japan and 47 Prefectures: 1990 and 2021 values with percent change (%), for both sexes ..... | 26 |
|----------------------------------------------------------------------------------------------------------------------------------------------------------------------------|----|

|                                                                                                                                                                             |    |
|-----------------------------------------------------------------------------------------------------------------------------------------------------------------------------|----|
| Table S6: COVID-19 mortality rate, percentage of total deaths, and COVID-19 age-standardised mortality rate in Japan and 47 prefectures, 2020 and 2021, for both sexes..... | 28 |
|-----------------------------------------------------------------------------------------------------------------------------------------------------------------------------|----|

|                                                                                                                                                                  |    |
|------------------------------------------------------------------------------------------------------------------------------------------------------------------|----|
| Table S7: COVID-19 DALY rate, percentage of total DALYs, and COVID-19 age-standardised DALY rate in Japan and 47 prefectures, 2020 and 2021, for both sexes..... | 29 |
|------------------------------------------------------------------------------------------------------------------------------------------------------------------|----|

# Supplementary Figures

Figure S1: Comparison of life expectancy across 47 prefectures in Japan in 1990 and 2021 for both sexes

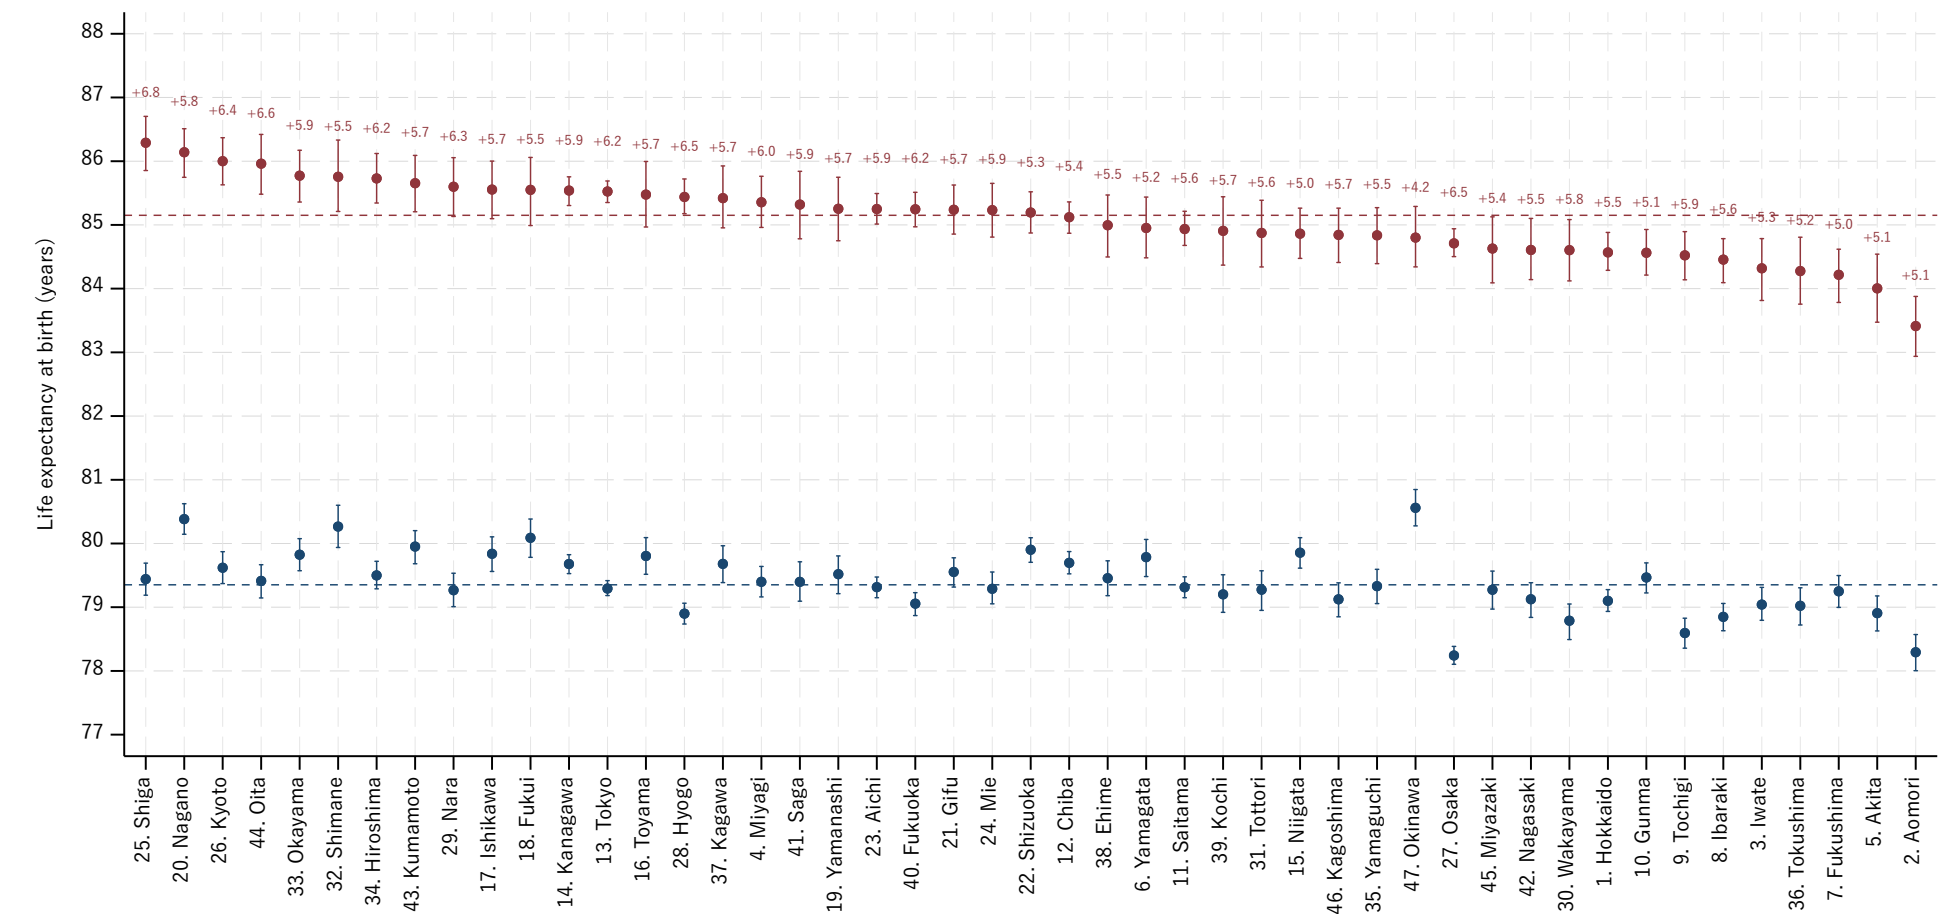

The error bars represent 95% uncertainty intervals. The red line indicates data for 2021, while the blue line represents 1990. The dotted lines show the national life expectancy at birth (79.4 years in 1990 and 85.2 years in 2021). The prefectures are ordered based on their 2021 life expectancy values, from highest to lowest, and are numbered from 1 to 47 according to their ISO codes. The positive values within the figure represent the gain between 1990 and 2021.



Figure S2: Comparison of healthy life expectancy across 47 prefectures in Japan in 1990 and 2021 for both sexes

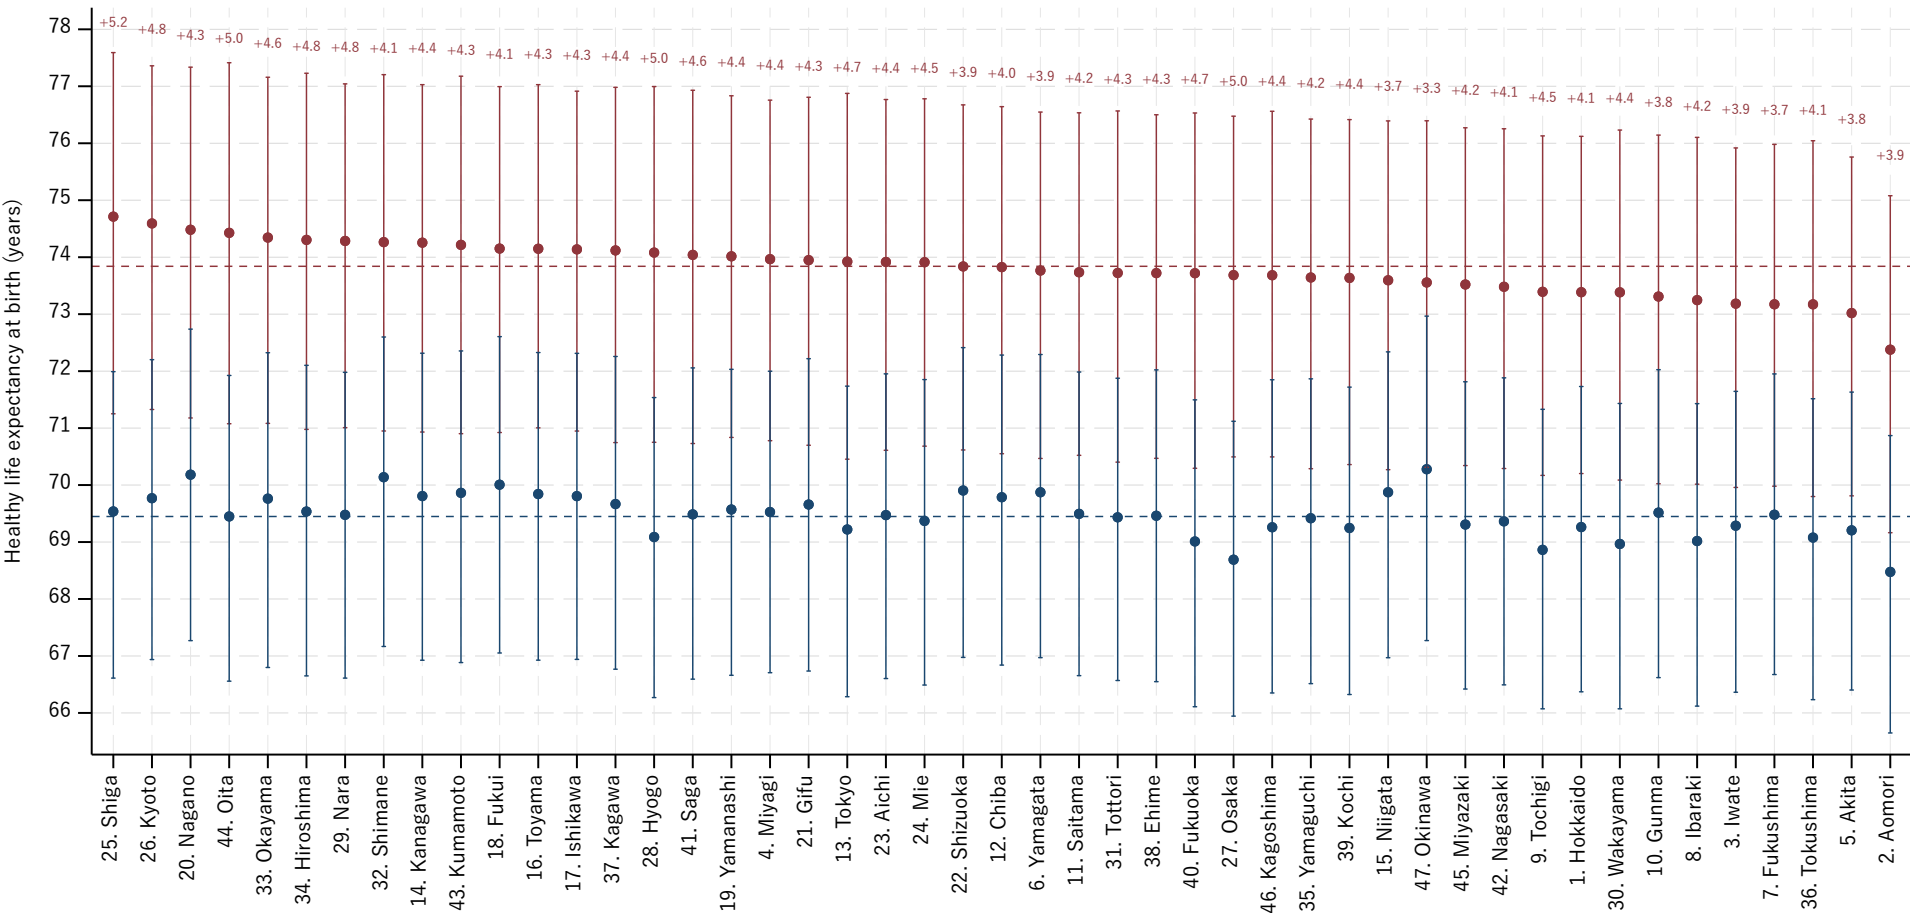

The error bars represent 95% uncertainty intervals. The red line indicates data for 2021, while the blue line represents 1990. The dotted lines show the national healthy life expectancy at birth (69.5 years in 1990 and 73.8 years in 2021). The prefectures are ordered based on their 2021 healthy life expectancy values, from highest to lowest, and are numbered from 1 to 47 according to their ISO codes. The positive values within the figure represent the gain between 1990 and 2021.

**Figure S3: Comparison of healthy life expectancy across 47 prefectures in Japan in 1990 and 2021 for (A) females and (B) males**

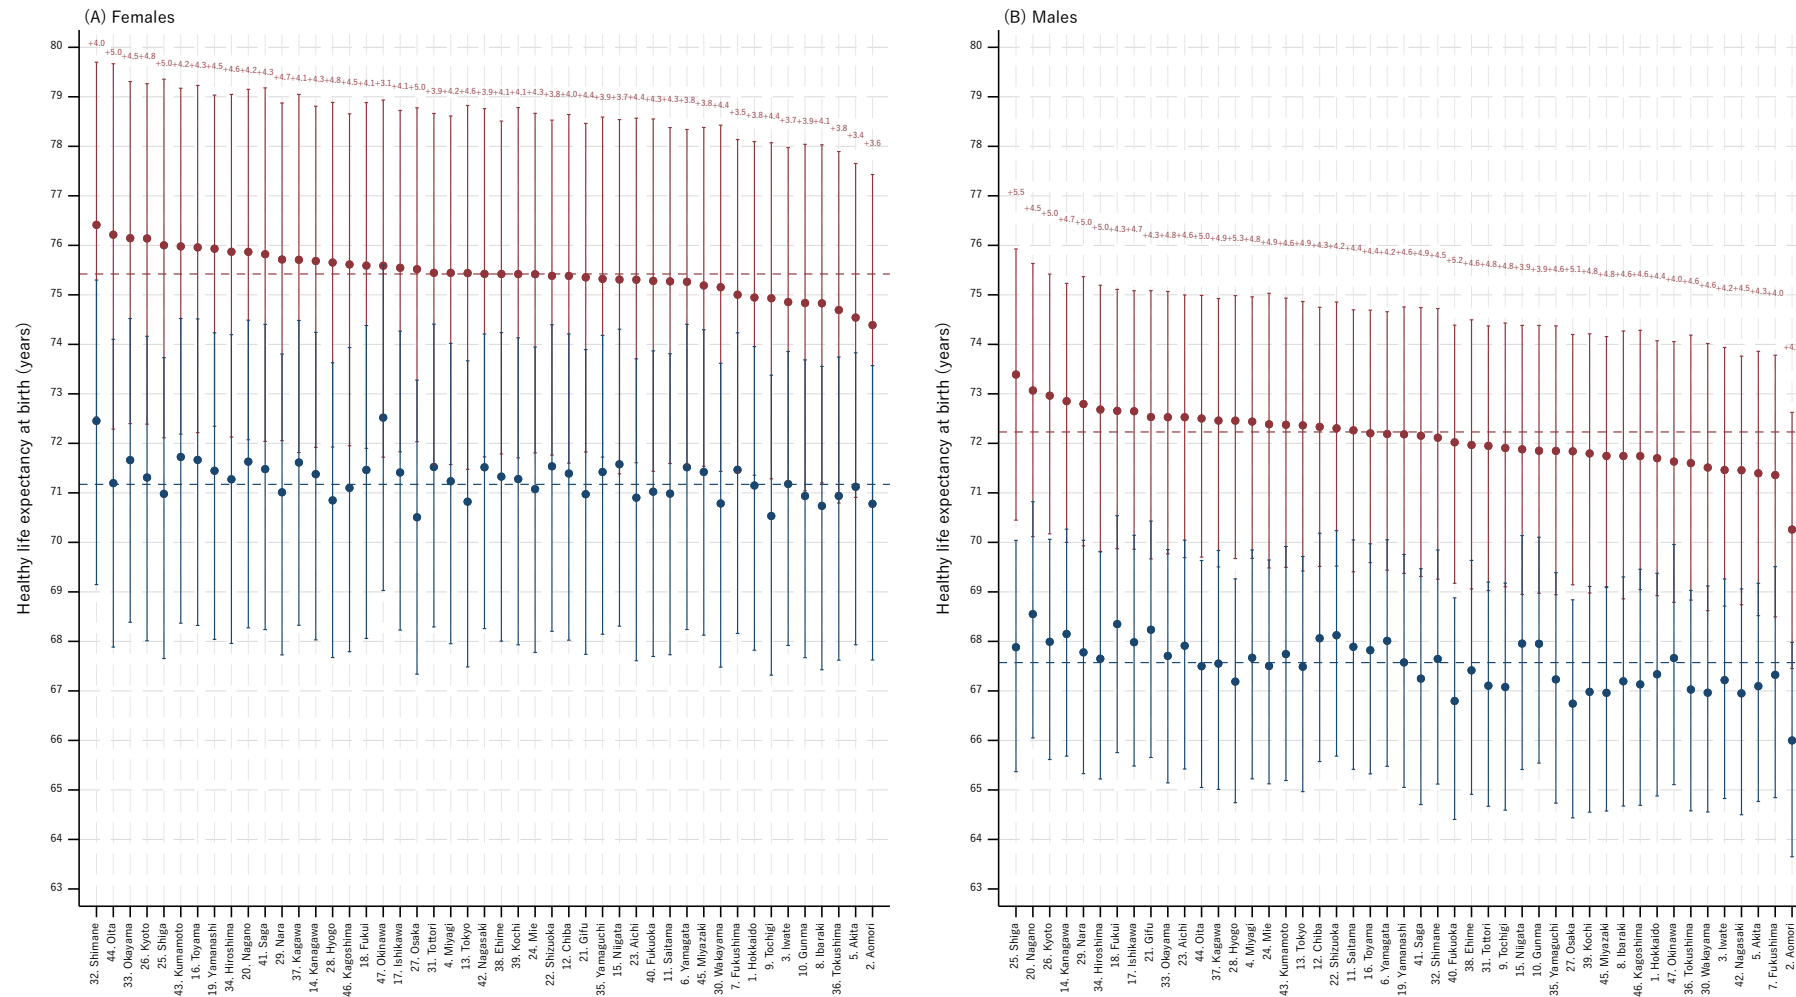

The error bars represent 95% uncertainty intervals. The red line indicates data for 2021, while the blue line represents 1990. The dotted lines show the national healthy life expectancy at birth (females: 71.2 years in 1990 and 75.4 years in 2021; males: 67.6 years in 1990 and 72.2 years in 2021). The prefectures are ordered based on their 2021 healthy life expectancy values, from highest to lowest, and are numbered from 1 to 47 according to their ISO codes. The positive values within the figure represent the gain between 1990 and 2021.

**Figure S4: Difference between life expectancy and healthy life expectancy across the 47 prefectures in (A) 1990 and (B) 2021 for both sexes**

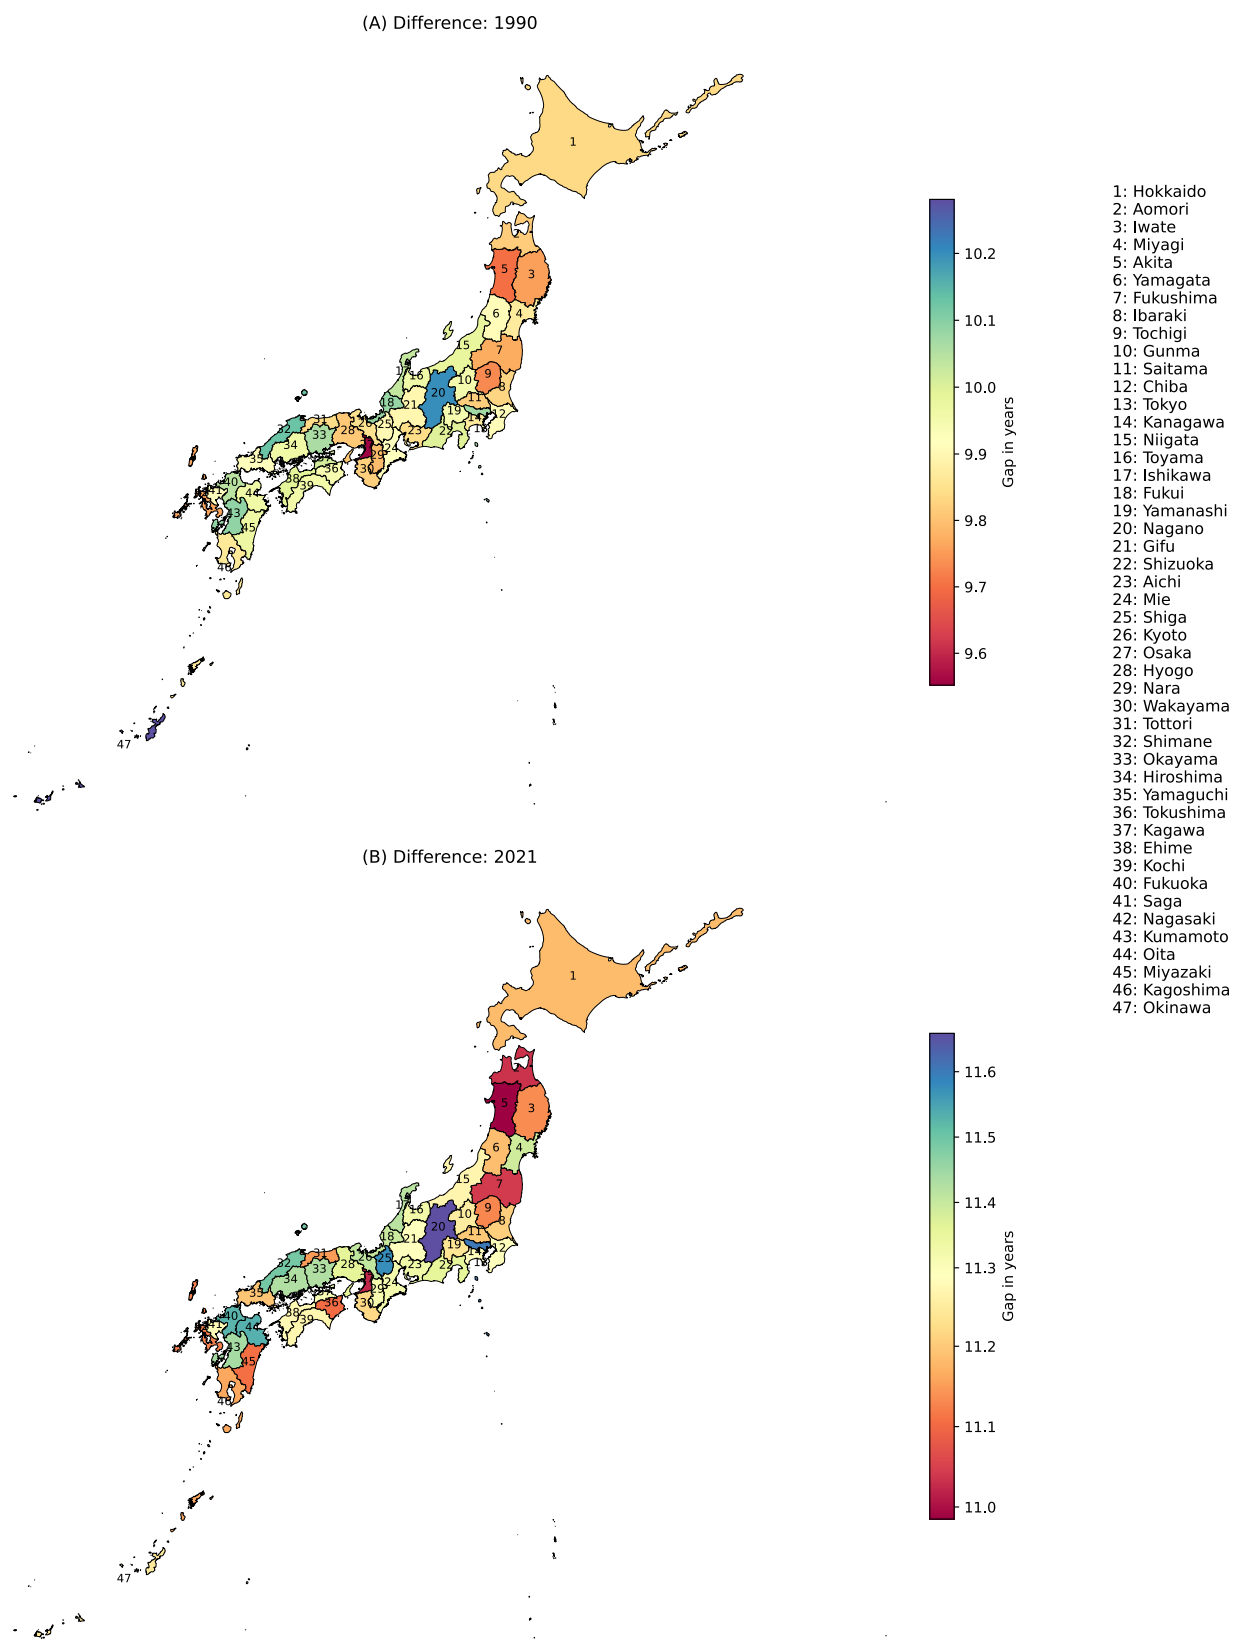

Pefectures are numbered from 1 to 47 according to their ISO codes.

**Figure S5: Maps of life expectancy and healthy life expectancy across 47 prefectures in Japan in 1990 and 2021 for both sexes**

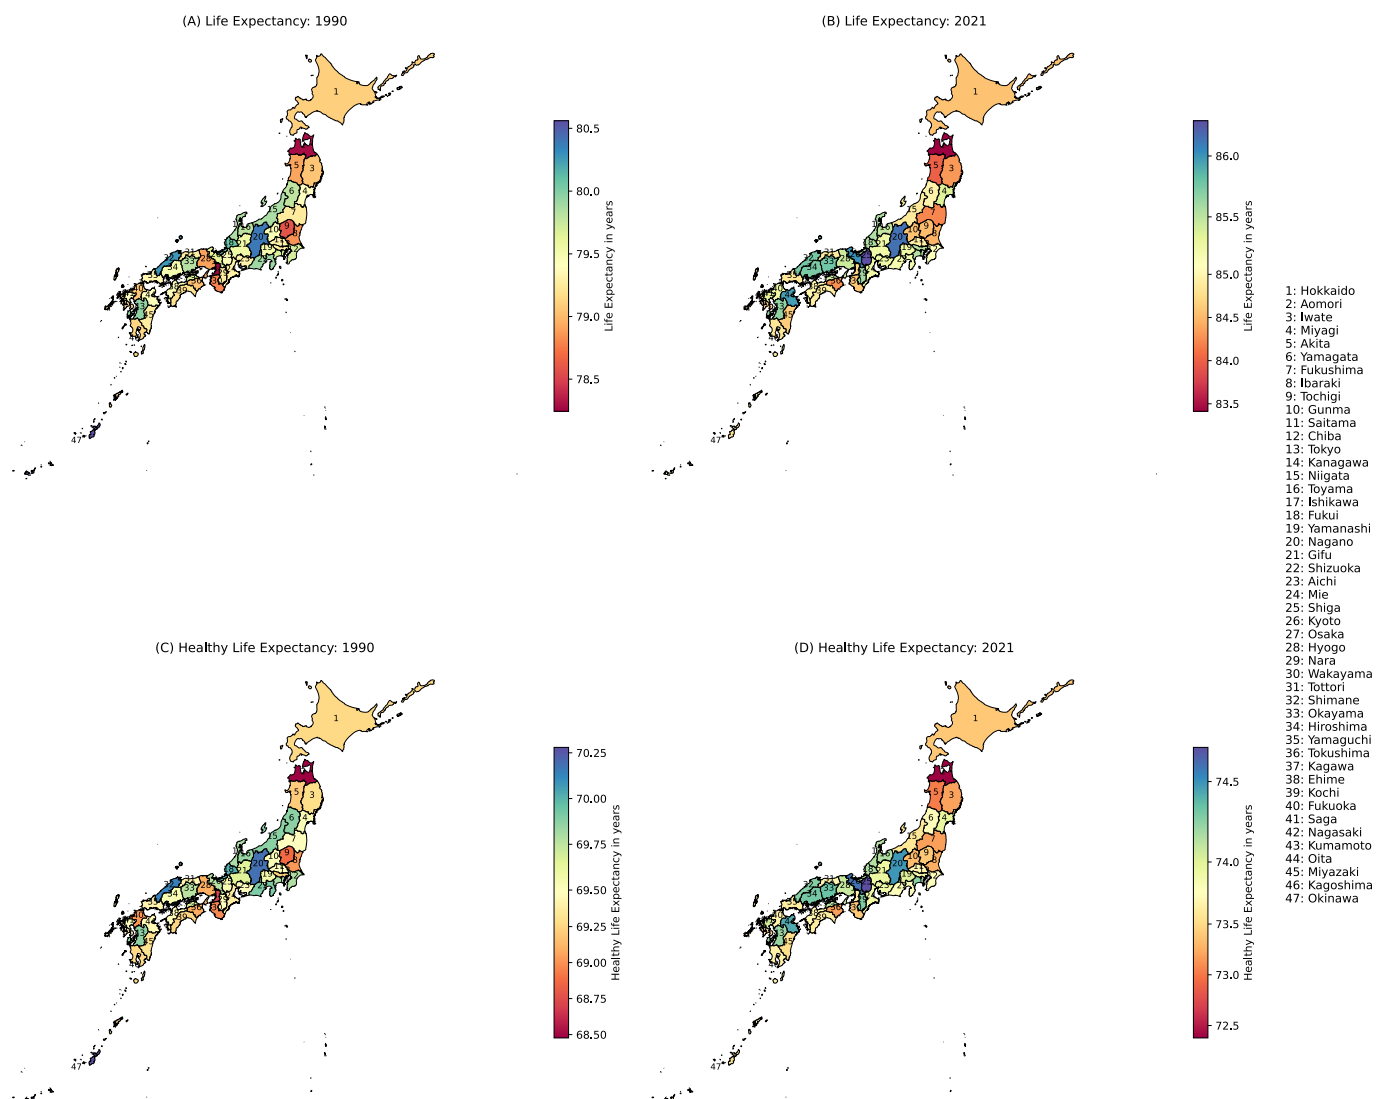

Pefectures are numbered from 1 to 47 according to their ISO codes.

**Figure S6: Maps of life expectancy and healthy life expectancy across 47 prefectures in Japan in 1990 and 2021 for females**

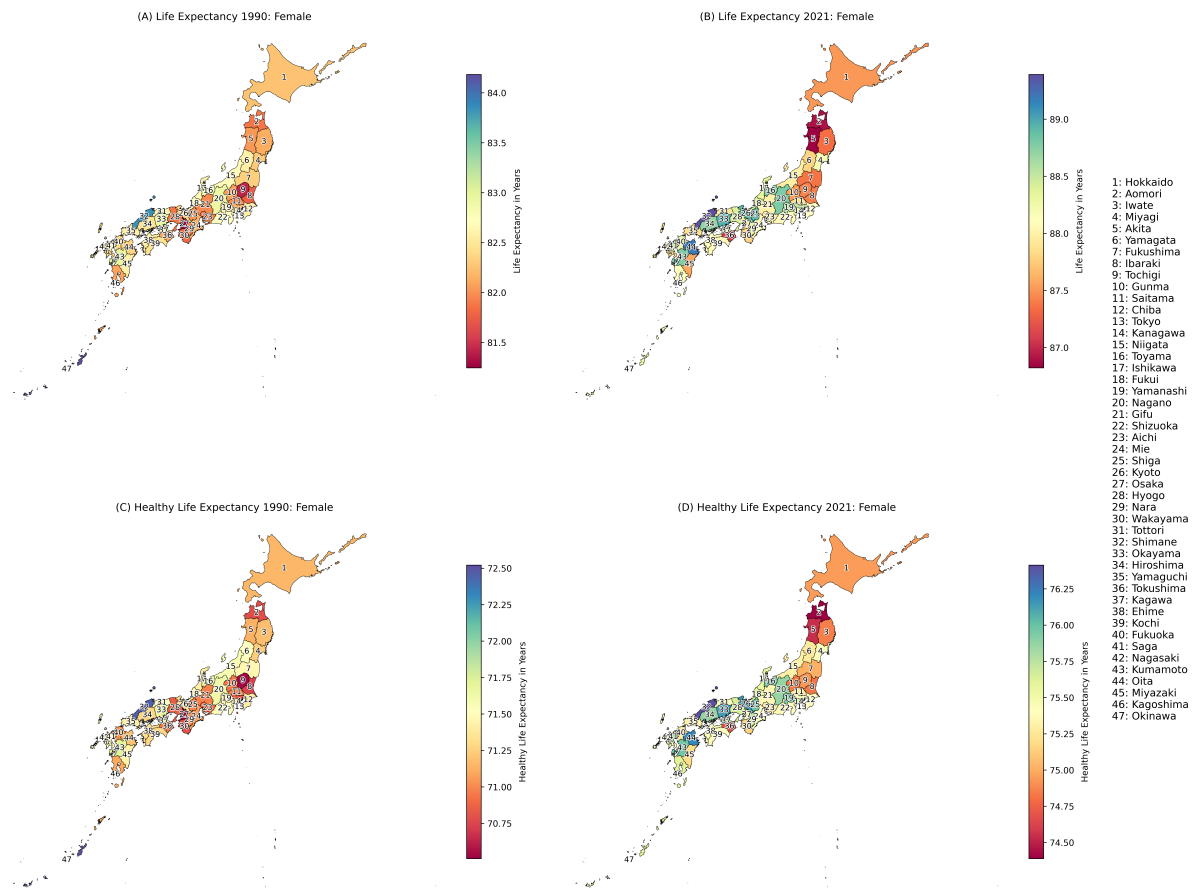

Pefectures are numbered from 1 to 47 according to their ISO codes.

**Figure S7: Maps of life expectancy and healthy life expectancy across 47 prefectures in Japan in 1990 and 2021 for males**

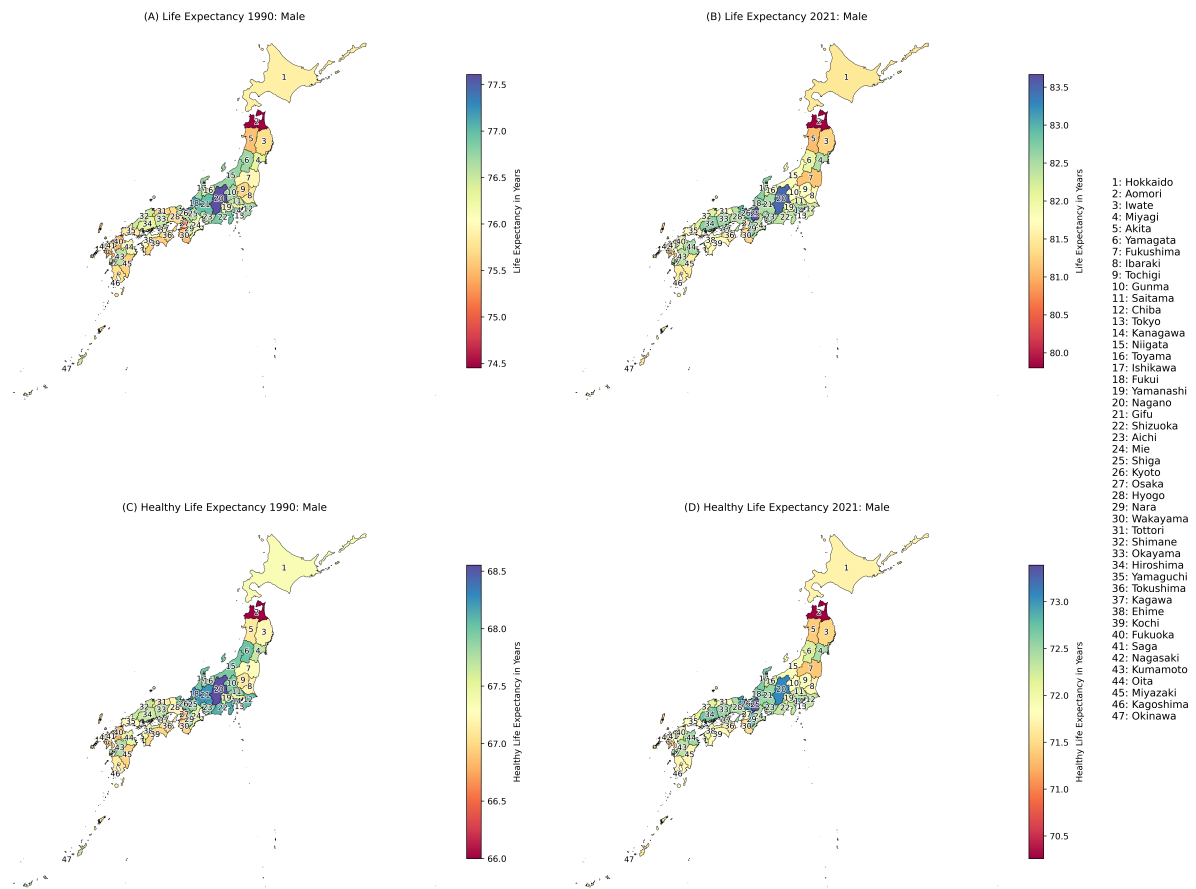

Pefectures are numbered from 1 to 47 according to their ISO codes.

**Figure S8: Comparison of all-cause age-standardised mortality rates across 47 prefectures in Japan in 1990 and 2021 for both sexes**

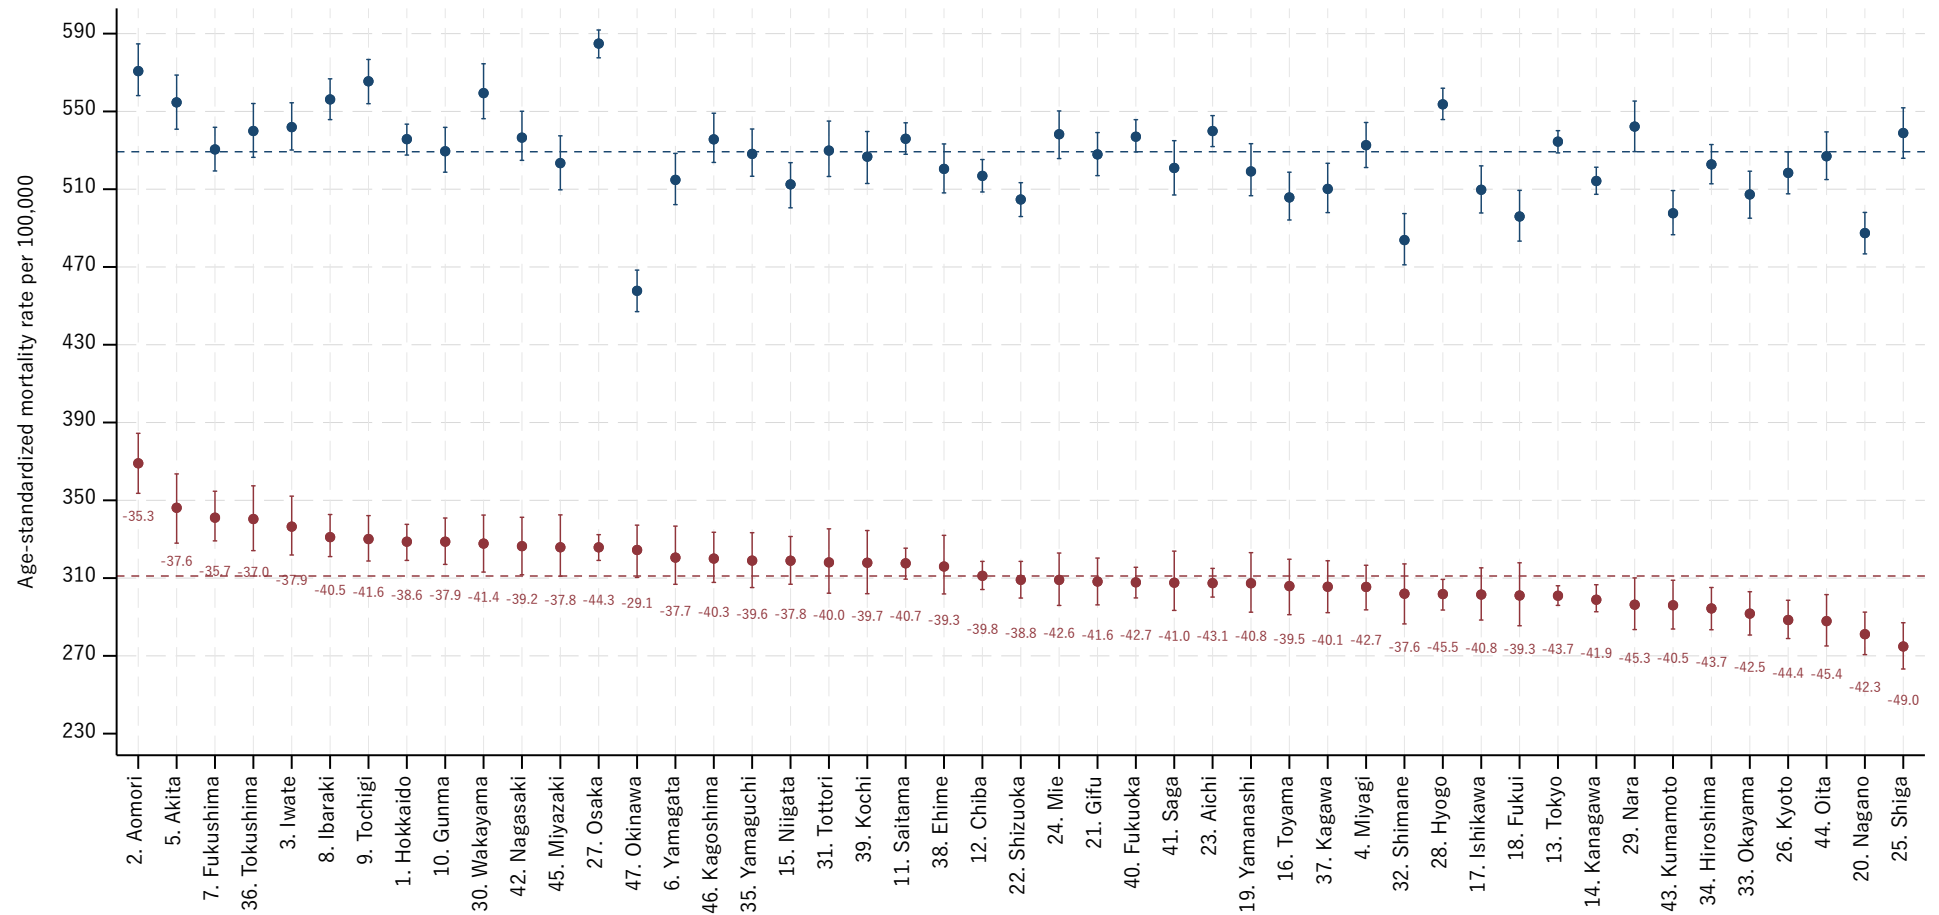

The error bars represent 95% uncertainty intervals. The red line indicates data for 2021, while the blue line represents 1990. The dotted lines show the national age-standardised mortality rate (529.3 per 100,000 population in 1990 and 311.1 in 2021). The prefectures are ordered based on their 2021 age-standardised mortality rates, from lowest to highest, and are numbered from 1 to 47 according to their ISO codes. The negative values within the figure represent the percentage difference (%) between 1990 and 2021.

**Figure S9: GBD level 3 causes of death in Japan for the years 1990, 2005, 2015, and 2021 for all ages and females, with annualised rates of change (ARC) for age-standardised mortality rates**

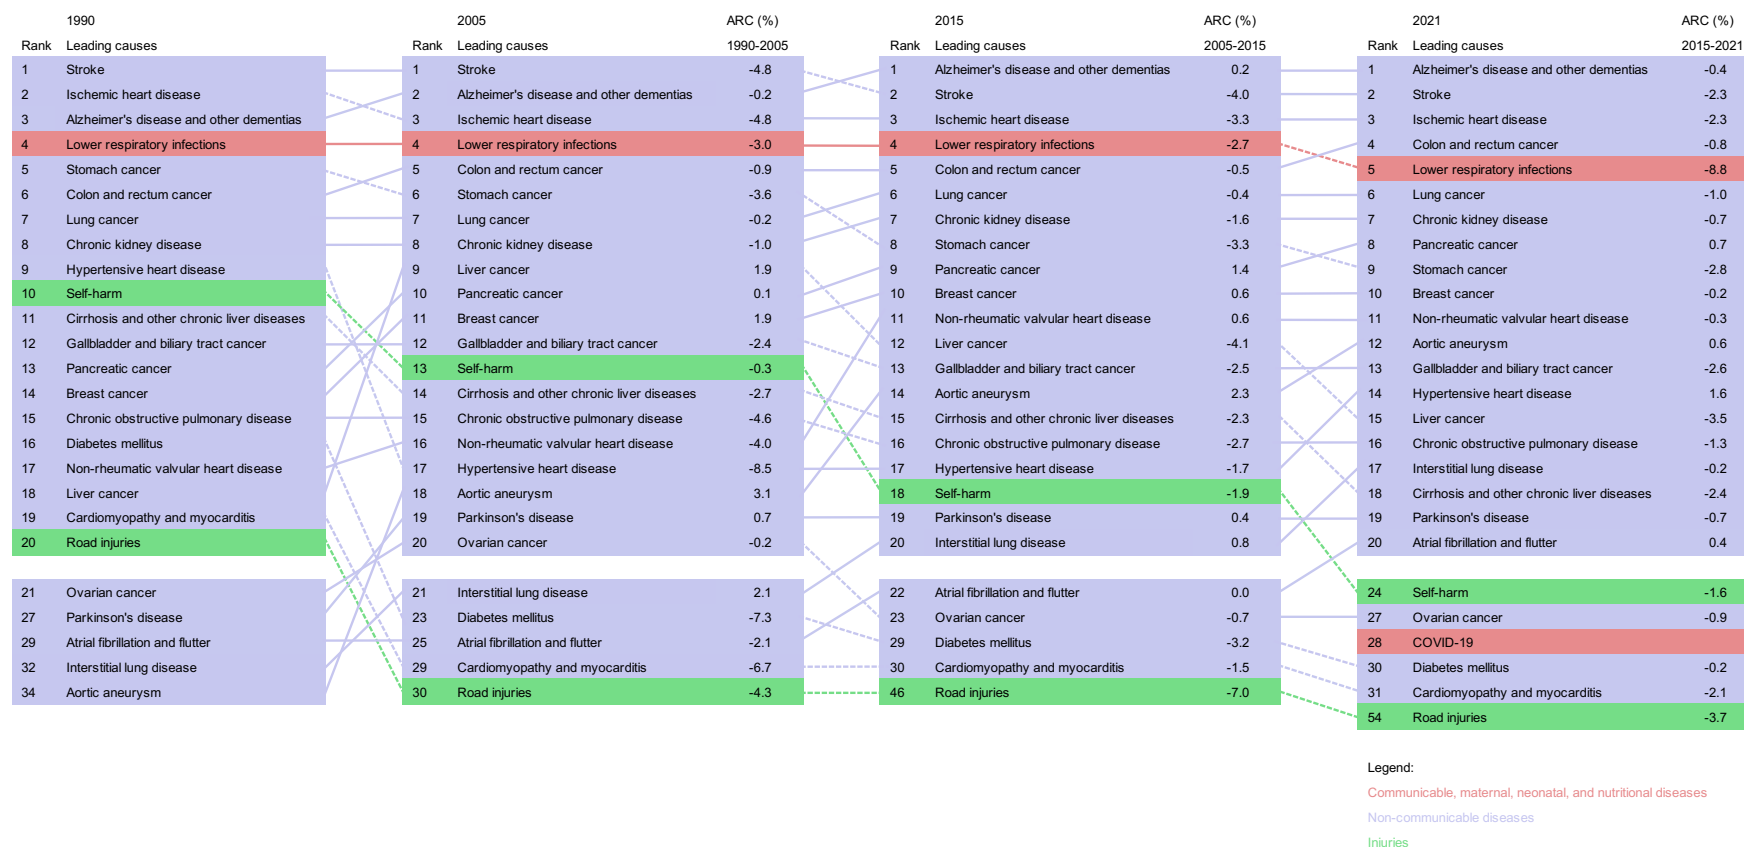

Rankings are based on the number of deaths from each cause.



**Figure S10: GBD level 3 causes of death in Japan for the years 1990, 2005, 2015, and 2021 for all ages and males, with annualised rates of change (ARC) for age-standardised mortality rates**

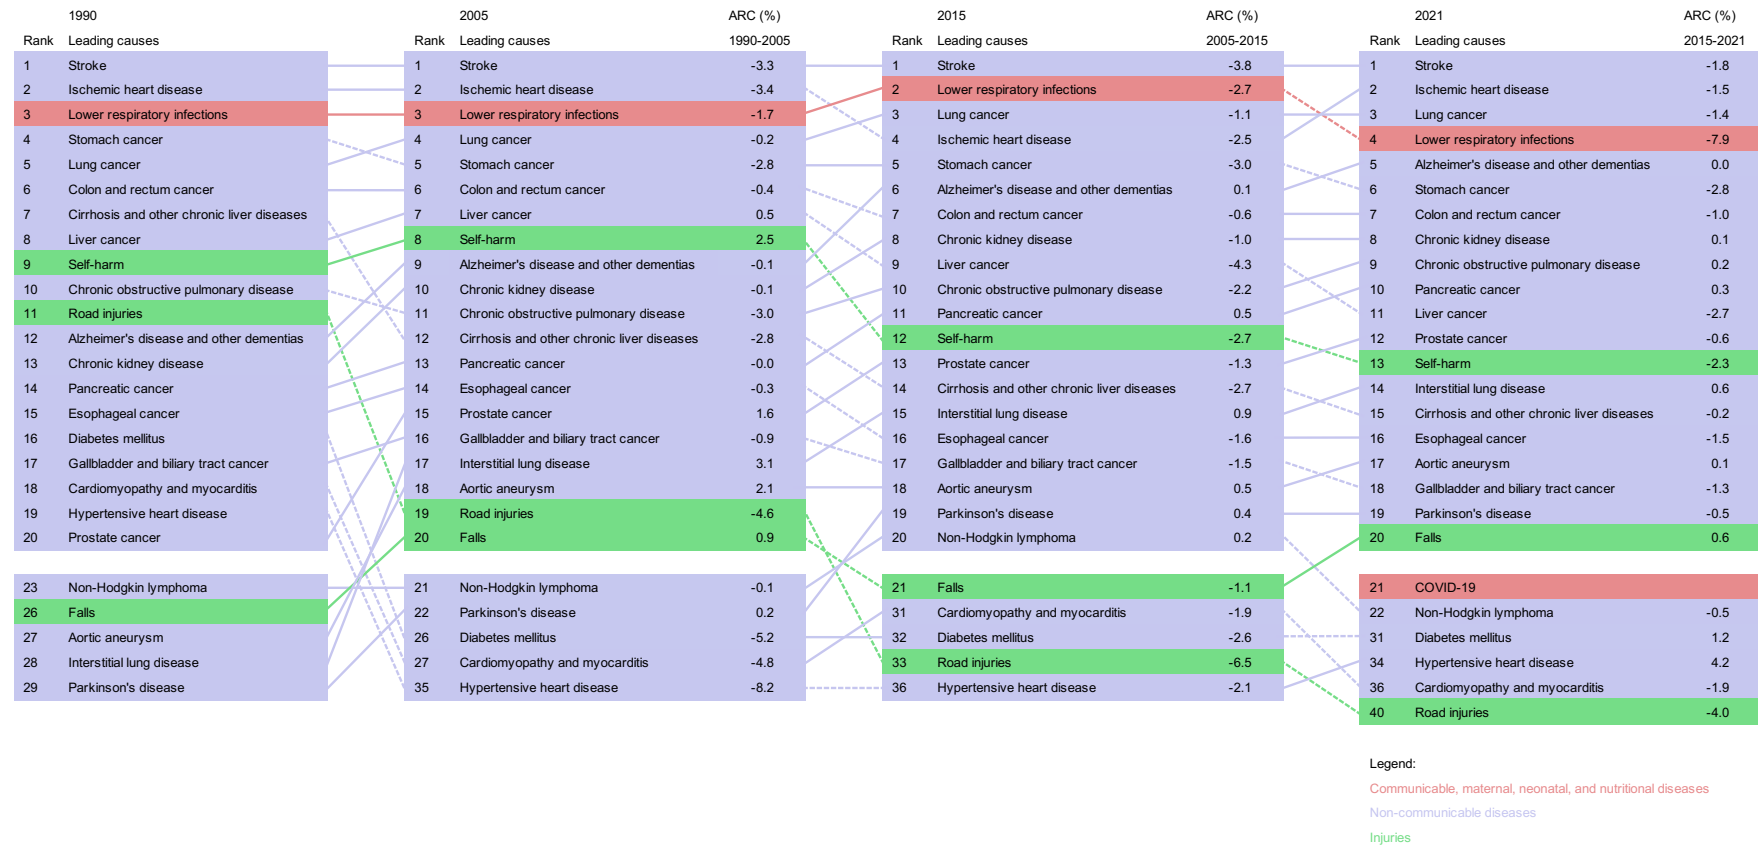

Rankings are based on the number of deaths from each cause.

**Figure S11: Comparison of COVID-19 age-standardised mortality rates across 47 prefectures in Japan in (A) 2020 and (B) 2021 for both sexes**

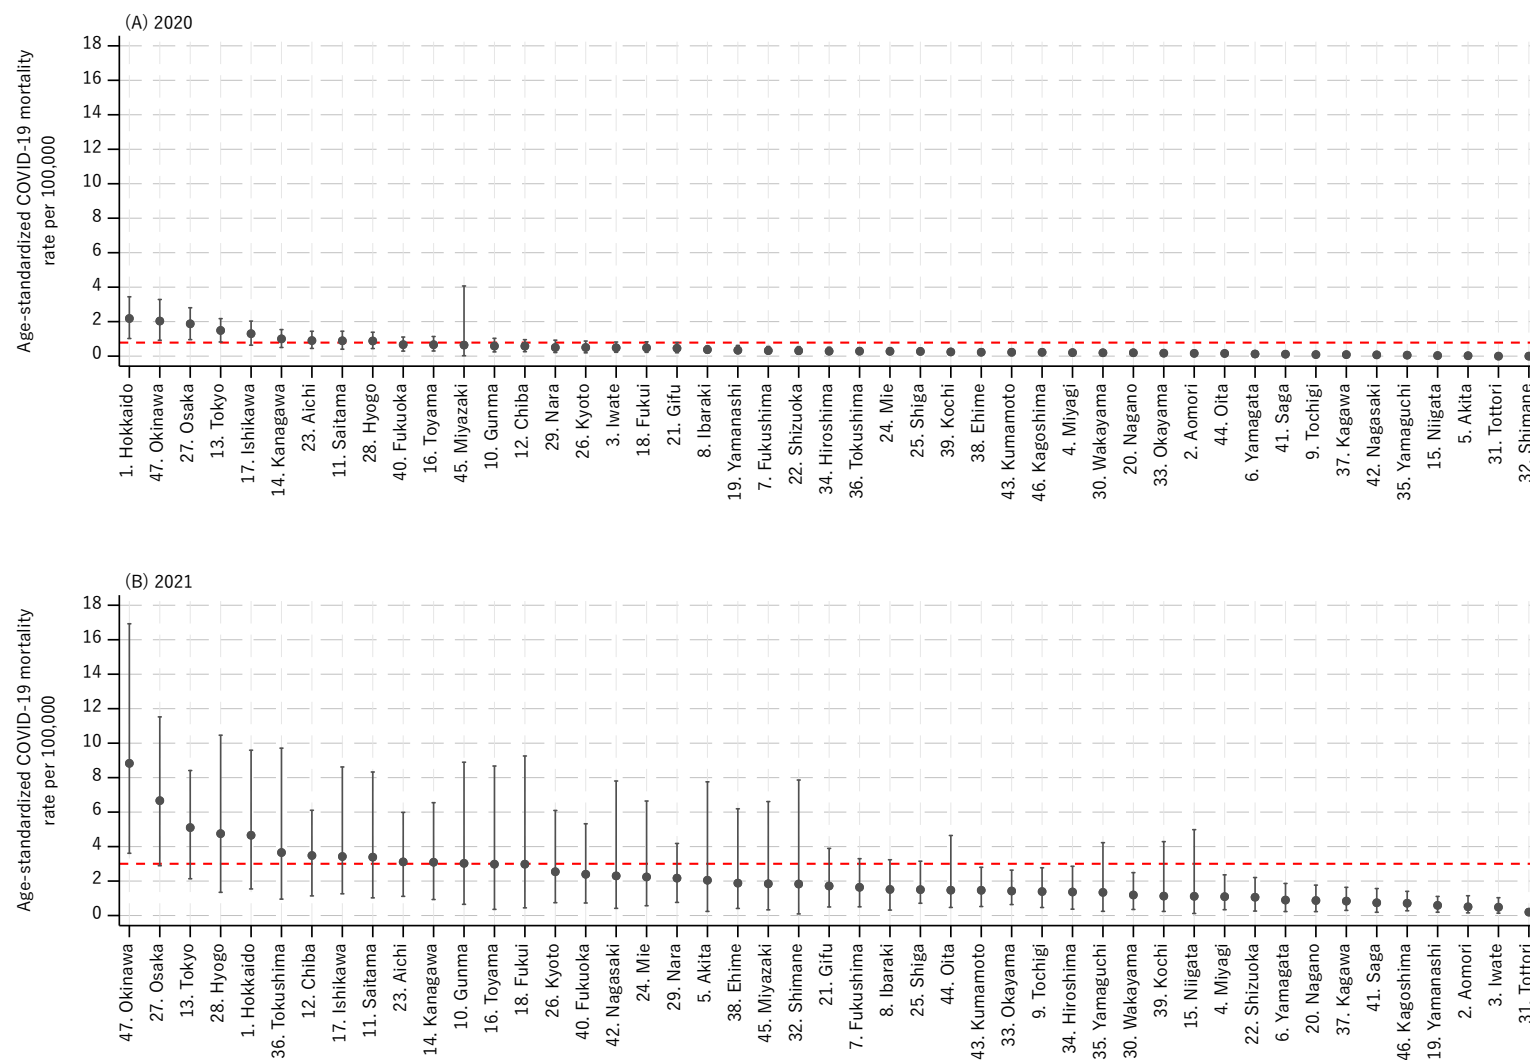

The error bars represent 95% uncertainty intervals; the red dotted lines indicate the national age-standardised mortality rate (0.8 per 100,000 population in 2020 and 3.0 in 2021).

Prefectures are numbered from 1 to 47 according to their ISO codes.

**Figure S12: GBD level 3 causes of disability-adjusted life years (DALYs) in Japan for the years 1990, 2005, 2015, and 2021 for all ages and both sexes, with annualised rates of change (ARC) for age-standardised DALY rate**

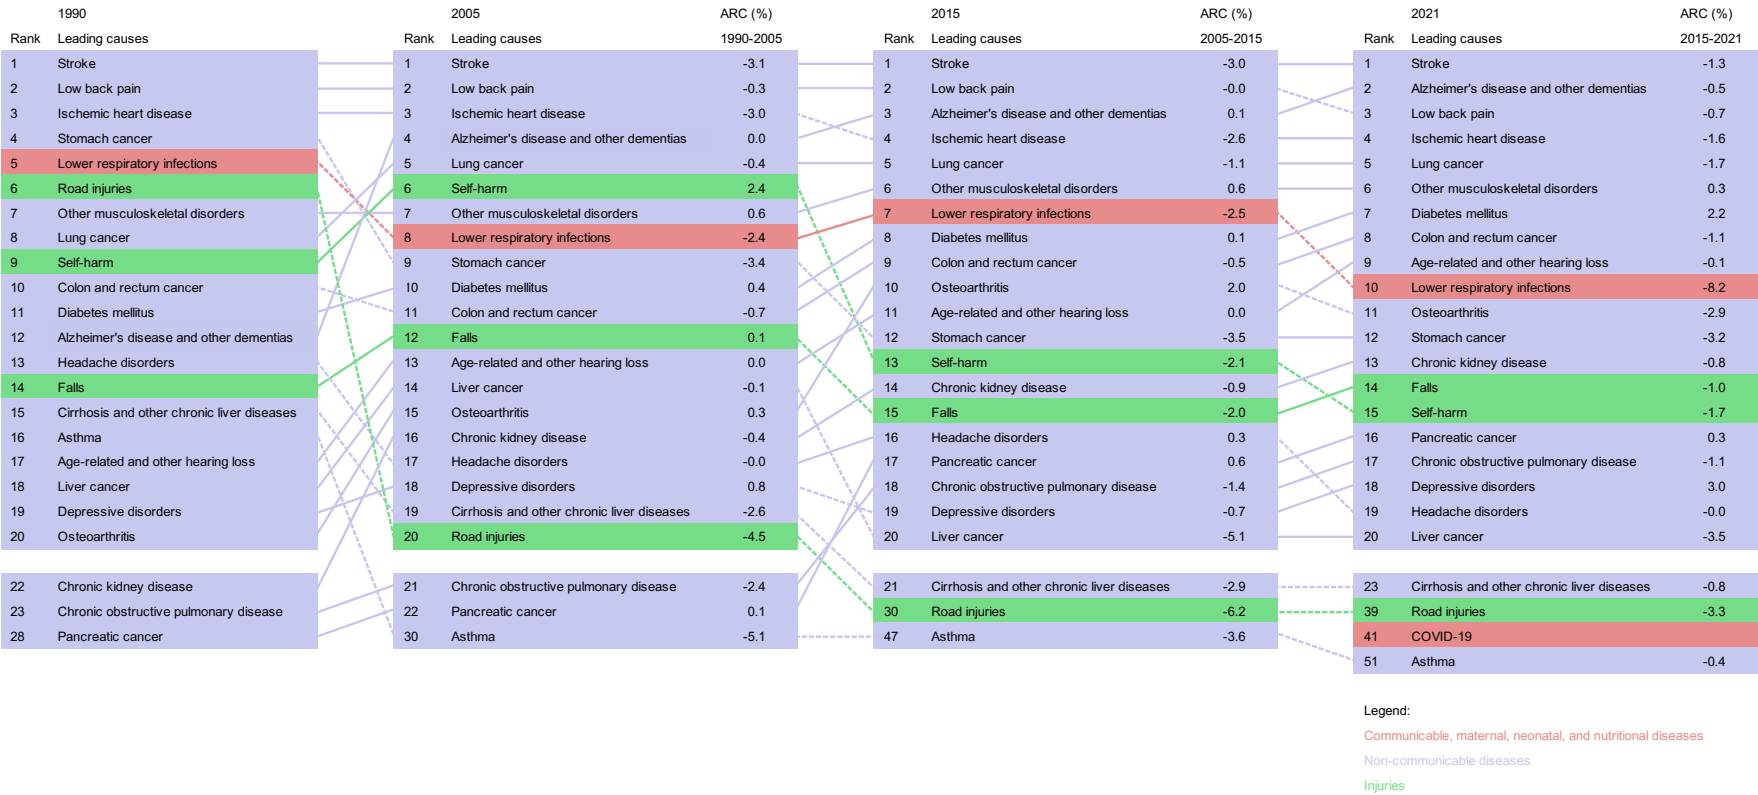

Rankings are based on the number of DALYs from each cause.

**Figure S13: GBD level 3 causes of disability-adjusted life years (DALYs) in Japan for the years 1990, 2005, 2015, and 2021 for all ages and females, with annualised rates of change (ARC) for age-standardised DALY rate**

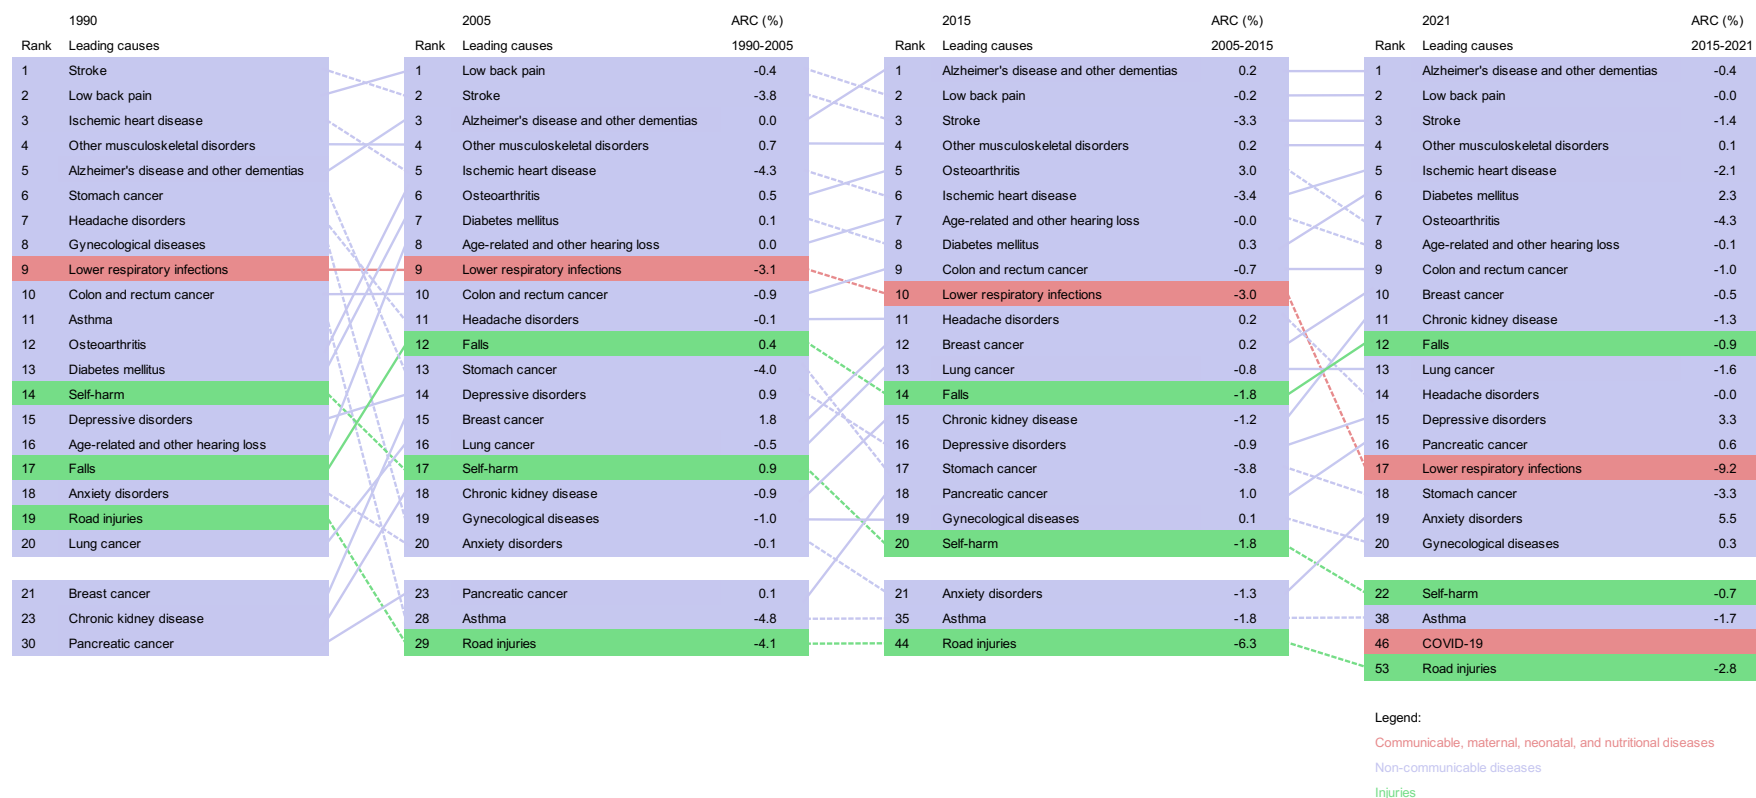

Rankings are based on the number of DALYs from each cause.

**Figure S14: GBD level 3 causes of disability-adjusted life years (DALYs) in Japan for the years 1990, 2005, 2015, and 2021 for all ages and males, with annualised rates of change (ARC) for age-standardised DALY rate**

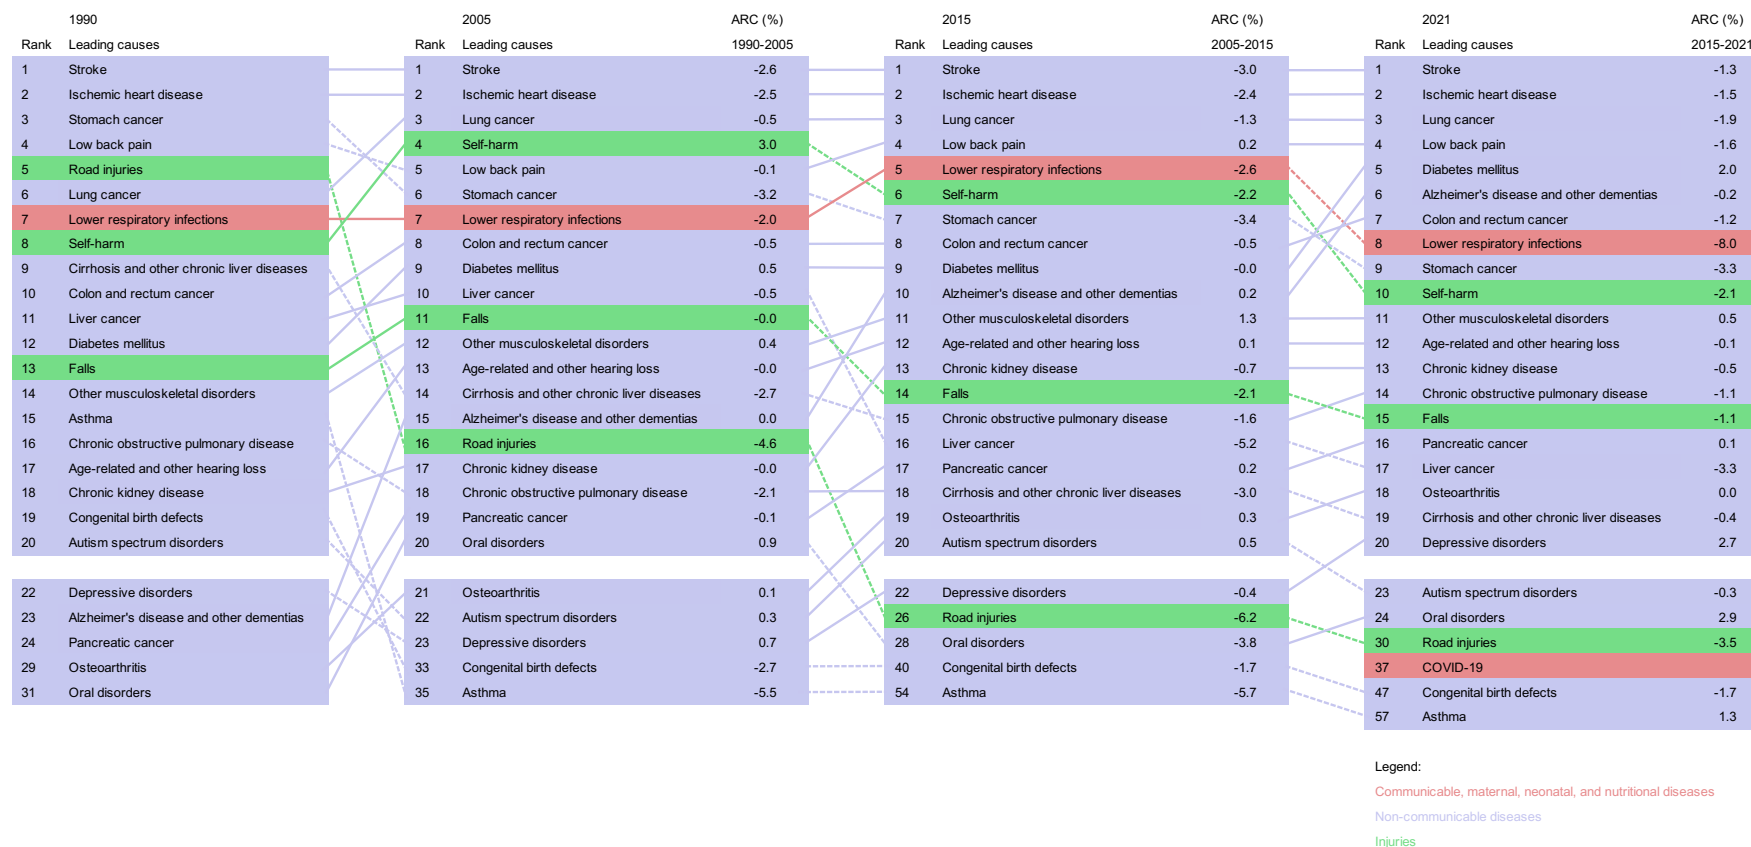

Rankings are based on the number of DALYs from each cause.

**Figure S15: GBD level 3 risk factors for (A) mortality and (B) DALYs in Japan for the years 1990, 2005, 2015, and 2021 for all ages and both sexes, with annualised rates of change (ARC) for age-standardised rates**

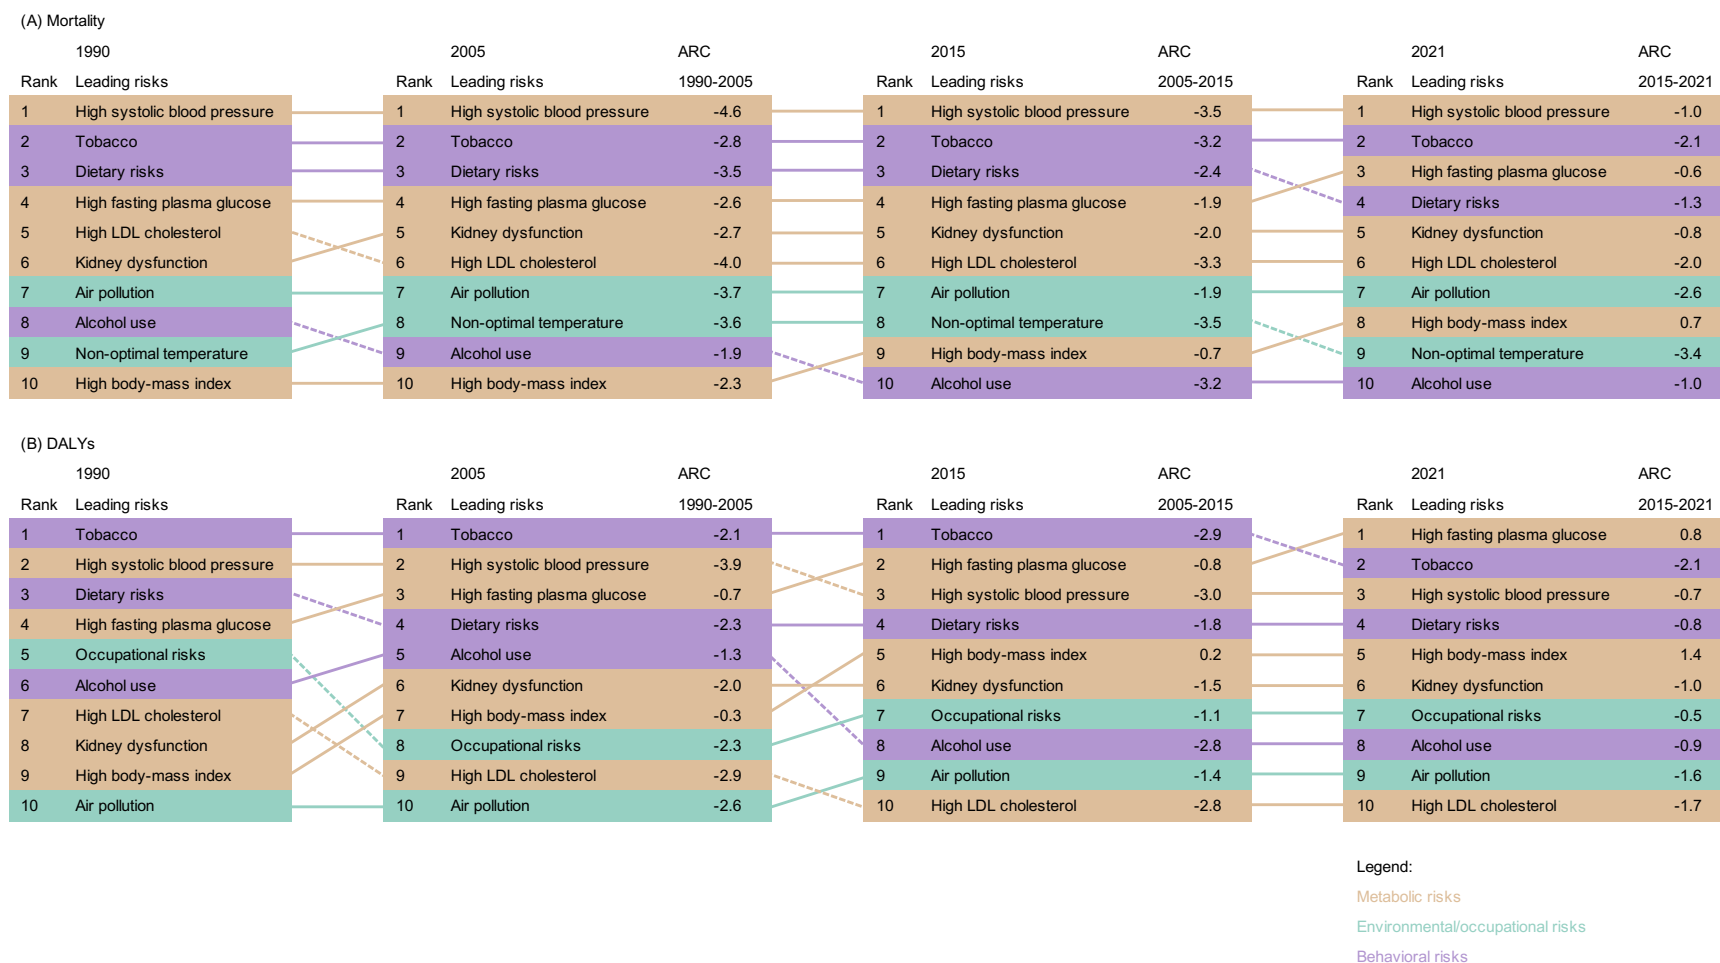

Rankings are based on the number of deaths and DALYs attributable to each risk factor, respectively.

## Supplementary Tables

**Table S1: GATHER checklist**

| Item#                                                                                                 | Checklist item                                                                                                                                                                                                                                                                                                                                                                            | Reporting location                                                                                                                                                                                                          |
|-------------------------------------------------------------------------------------------------------|-------------------------------------------------------------------------------------------------------------------------------------------------------------------------------------------------------------------------------------------------------------------------------------------------------------------------------------------------------------------------------------------|-----------------------------------------------------------------------------------------------------------------------------------------------------------------------------------------------------------------------------|
| <b>Objectives and funding</b>                                                                         |                                                                                                                                                                                                                                                                                                                                                                                           |                                                                                                                                                                                                                             |
| 1                                                                                                     | Define the indicator(s), populations (including age, sex, and geographic entities), and time period(s) for which estimates were made.                                                                                                                                                                                                                                                     | Main text methods                                                                                                                                                                                                           |
| 2                                                                                                     | List the funding sources for the work.                                                                                                                                                                                                                                                                                                                                                    | Main text (acknowledgement section); primary funder given in the “funding” section of the summary                                                                                                                           |
| <b>Data Inputs</b>                                                                                    |                                                                                                                                                                                                                                                                                                                                                                                           |                                                                                                                                                                                                                             |
| <i>For all data inputs from multiple sources that are synthesized as part of the study:</i>           |                                                                                                                                                                                                                                                                                                                                                                                           |                                                                                                                                                                                                                             |
| 3                                                                                                     | Describe how the data were identified and how the data were accessed.                                                                                                                                                                                                                                                                                                                     | Main text methods, with references provided for access to full details                                                                                                                                                      |
| 4                                                                                                     | Specify the inclusion and exclusion criteria. Identify all ad-hoc exclusions                                                                                                                                                                                                                                                                                                              | References provided in the main text methods for access to full details                                                                                                                                                     |
| 5                                                                                                     | Provide information on all included data sources and their main characteristics. For each data source used, report reference information or contact name/institution, population represented, data collection method, year(s) of data collection, sex and age range, diagnostic criteria or measurement method, and sample size, as relevant.                                             | Overview in main text methods; citations for all references available at <a href="https://ghdx.healthdata.org/gbd-2021/sources">https://ghdx.healthdata.org/gbd-2021/sources</a>                                            |
| 6                                                                                                     | Identify and describe any categories of input data that have potentially important biases (e.g., based on characteristics listed in item 5).                                                                                                                                                                                                                                              | Main text limitations section                                                                                                                                                                                               |
| <i>For data inputs that contribute to the analysis but were not synthesized as part of the study:</i> |                                                                                                                                                                                                                                                                                                                                                                                           |                                                                                                                                                                                                                             |
| 7                                                                                                     | Describe and give sources for any other data inputs.                                                                                                                                                                                                                                                                                                                                      | NA                                                                                                                                                                                                                          |
| <i>For all data inputs:</i>                                                                           |                                                                                                                                                                                                                                                                                                                                                                                           |                                                                                                                                                                                                                             |
| 8                                                                                                     | Provide all data inputs in a file format from which data can be efficiently extracted (e.g., a spreadsheet rather than a PDF), including all relevant meta-data listed in item 5. For any data inputs that cannot be shared because of ethical or legal reasons, such as third-party ownership, provide a contact name or the name of the institution that retains the right to the data. | <a href="http://ghdx.healthdata.org/gbd-2021/sources">http://ghdx.healthdata.org/gbd-2021/sources</a><br>Availability of data is dependent on data use agreements; contact information provided when not directly available |
| <b>Data analysis</b>                                                                                  |                                                                                                                                                                                                                                                                                                                                                                                           |                                                                                                                                                                                                                             |
| 9                                                                                                     | Provide a conceptual overview of the data analysis method. A diagram may be helpful.                                                                                                                                                                                                                                                                                                      | Main text methods, with references provided for access to full details                                                                                                                                                      |

|                               |                                                                                                                                                                                                                                                                         |                                                                                                                                                                                                                                                         |
|-------------------------------|-------------------------------------------------------------------------------------------------------------------------------------------------------------------------------------------------------------------------------------------------------------------------|---------------------------------------------------------------------------------------------------------------------------------------------------------------------------------------------------------------------------------------------------------|
| 10                            | Provide a detailed description of all steps of the analysis, including mathematical formulae. This description should cover, as relevant, data cleaning, data pre-processing, data adjustments and weighting of data sources, and mathematical or statistical model(s). | Main text methods, with references provided for access to full details                                                                                                                                                                                  |
| 11                            | Describe how candidate models were evaluated and how the final model(s) were selected.                                                                                                                                                                                  | References provided in the main text methods for access to full details                                                                                                                                                                                 |
| 12                            | Provide the results of an evaluation of model performance, if done, as well as the results of any relevant sensitivity analysis.                                                                                                                                        | NA                                                                                                                                                                                                                                                      |
| 13                            | Describe methods for calculating uncertainty of the estimates. State which sources of uncertainty were, and were not, accounted for in the uncertainty analysis.                                                                                                        | Main text methods                                                                                                                                                                                                                                       |
| 14                            | State how analytic or statistical source code used to generate estimates can be accessed.                                                                                                                                                                               | <a href="https://ghdx.healthdata.org/gbd-2021/code">https://ghdx.healthdata.org/gbd-2021/code</a>                                                                                                                                                       |
| <b>Results and Discussion</b> |                                                                                                                                                                                                                                                                         |                                                                                                                                                                                                                                                         |
| 15                            | Provide published estimates in a file format from which data can be efficiently extracted.                                                                                                                                                                              | All estimates are available for download at <a href="https://vizhub.healthdata.org/gbd-results/">https://vizhub.healthdata.org/gbd-results/</a> and <a href="https://vizhub.healthdata.org/gbd-compare/">https://vizhub.healthdata.org/gbd-compare/</a> |
| 16                            | Report a quantitative measure of the uncertainty of the estimates (e.g. uncertainty intervals).                                                                                                                                                                         | UIs provided for all estimates throughout the main text (summary, results, and discussion sections)                                                                                                                                                     |
| 17                            | Interpret results in light of existing evidence. If updating a previous set of estimates, describe the reasons for changes in estimates.                                                                                                                                | Main text discussion                                                                                                                                                                                                                                    |
| 18                            | Discuss limitations of the estimates. Include a discussion of any modelling assumptions or data limitations that affect interpretation of the estimates.                                                                                                                | Main text limitations section                                                                                                                                                                                                                           |



**Table S2: Life expectancy and healthy life expectancy at birth (years) in Japan and 47 prefectures, 1990 and 2021, for both sexes**

| Prefecture   | Life expectancy (95% UI) |      |                         |      |            |      | Healthy life expectancy (95% UI) |      |                         |      |            |      |
|--------------|--------------------------|------|-------------------------|------|------------|------|----------------------------------|------|-------------------------|------|------------|------|
|              | 1990                     | Rank | 2021                    | Rank | Increase   | Rank | 1990                             | Rank | 2021                    | Rank | Increase   | Rank |
| <b>Japan</b> | <b>79.4 (79.3–79.4)</b>  |      | <b>85.2 (85.1–85.2)</b> |      | <b>5.8</b> |      | <b>69.4 (66.6–72.0)</b>          |      | <b>73.8 (70.5–76.7)</b> |      | <b>4.4</b> |      |
| Hokkaido     | 79.1 (78.9–79.3)         | 37   | 84.6 (84.3–84.9)        | 39   | 5.5        | 34   | 69.3 (66.4–71.7)                 | 35   | 73.4 (70.2–76.1)        | 39   | 4.1        | 35   |
| Aomori       | 78.3 (78.0–78.6)         | 46   | 83.4 (82.9–83.9)        | 47   | 5.1        | 42   | 68.5 (65.6–70.9)                 | 47   | 72.4 (69.2–75.1)        | 47   | 3.9        | 40   |
| Iwate        | 79.0 (78.8–79.3)         | 39   | 84.3 (83.8–84.8)        | 43   | 5.3        | 39   | 69.3 (66.4–71.6)                 | 34   | 73.2 (70.0–75.9)        | 43   | 3.9        | 41   |
| Miyagi       | 79.4 (79.2–79.6)         | 23   | 85.4 (85.0–85.8)        | 17   | 6.0        | 10   | 69.5 (66.7–72.0)                 | 20   | 74.0 (70.8–76.8)        | 18   | 4.4        | 18   |
| Akita        | 78.9 (78.6–79.2)         | 41   | 84.0 (83.5–84.5)        | 46   | 5.1        | 43   | 69.2 (66.4–71.6)                 | 39   | 73.0 (69.8–75.8)        | 46   | 3.8        | 43   |
| Yamagata     | 79.8 (79.5–80.1)         | 11   | 85.0 (84.5–85.4)        | 27   | 5.2        | 41   | 69.9 (67.0–72.3)                 | 7    | 73.8 (70.5–76.5)        | 25   | 3.9        | 42   |
| Fukushima    | 79.3 (79.0–79.5)         | 33   | 84.2 (83.8–84.6)        | 45   | 5.0        | 46   | 69.5 (66.7–72.0)                 | 24   | 73.2 (70.0–76.0)        | 44   | 3.7        | 46   |
| Ibaraki      | 78.8 (78.6–79.1)         | 43   | 84.5 (84.1–84.8)        | 42   | 5.6        | 28   | 69.0 (66.1–71.4)                 | 42   | 73.2 (70.0–76.1)        | 42   | 4.2        | 30   |
| Tochigi      | 78.6 (78.4–78.8)         | 45   | 84.5 (84.1–84.9)        | 41   | 5.9        | 14   | 68.9 (66.1–71.3)                 | 45   | 73.4 (70.2–76.1)        | 38   | 4.5        | 13   |
| Gunma        | 79.5 (79.2–79.7)         | 19   | 84.6 (84.2–84.9)        | 40   | 5.1        | 44   | 69.5 (66.6–72.0)                 | 21   | 73.3 (70.0–76.1)        | 41   | 3.8        | 44   |
| Saitama      | 79.3 (79.1–79.5)         | 27   | 84.9 (84.7–85.2)        | 28   | 5.6        | 27   | 69.5 (66.7–72.0)                 | 22   | 73.7 (70.5–76.5)        | 26   | 4.2        | 29   |
| Chiba        | 79.7 (79.5–79.9)         | 12   | 85.1 (84.9–85.4)        | 25   | 5.4        | 36   | 69.8 (66.8–72.3)                 | 12   | 73.8 (70.6–76.6)        | 24   | 4.0        | 38   |
| Tokyo        | 79.3 (79.2–79.4)         | 28   | 85.5 (85.4–85.7)        | 13   | 6.2        | 7    | 69.2 (66.3–71.7)                 | 38   | 73.9 (70.5–76.9)        | 20   | 4.7        | 9    |
| Kanagawa     | 79.7 (79.5–79.8)         | 14   | 85.5 (85.3–85.8)        | 12   | 5.9        | 16   | 69.8 (66.9–72.3)                 | 10   | 74.3 (70.9–77.0)        | 9    | 4.4        | 15   |
| Niigata      | 79.9 (79.6–80.1)         | 7    | 84.9 (84.5–85.3)        | 31   | 5.0        | 45   | 69.9 (67.0–72.3)                 | 6    | 73.6 (70.3–76.4)        | 34   | 3.7        | 45   |
| Toyama       | 79.8 (79.5–80.1)         | 10   | 85.5 (85.0–86.0)        | 14   | 5.7        | 26   | 69.8 (66.9–72.3)                 | 9    | 74.1 (71.0–77.0)        | 12   | 4.3        | 24   |
| Ishikawa     | 79.8 (79.6–80.1)         | 8    | 85.6 (85.1–86.0)        | 10   | 5.7        | 22   | 69.8 (66.9–72.3)                 | 11   | 74.1 (70.9–76.9)        | 13   | 4.3        | 23   |
| Fukui        | 80.1 (79.8–80.4)         | 4    | 85.6 (85.0–86.1)        | 11   | 5.5        | 35   | 70.0 (67.1–72.6)                 | 4    | 74.2 (70.9–77.0)        | 11   | 4.1        | 33   |
| Yamanashi    | 79.5 (79.2–79.8)         | 17   | 85.3 (84.8–85.7)        | 19   | 5.7        | 20   | 69.6 (66.7–72.0)                 | 17   | 74.0 (70.8–76.8)        | 17   | 4.4        | 16   |
| Nagano       | 80.4 (80.1–80.6)         | 2    | 86.1 (85.7–86.5)        | 2    | 5.8        | 18   | 70.2 (67.3–72.7)                 | 2    | 74.5 (71.2–77.3)        | 3    | 4.3        | 25   |
| Gifu         | 79.6 (79.3–79.8)         | 16   | 85.2 (84.9–85.6)        | 22   | 5.7        | 25   | 69.7 (66.7–72.2)                 | 16   | 73.9 (70.7–76.8)        | 19   | 4.3        | 26   |
| Shizuoka     | 79.9 (79.7–80.1)         | 6    | 85.2 (84.9–85.5)        | 24   | 5.3        | 38   | 69.9 (67.0–72.4)                 | 5    | 73.8 (70.6–76.7)        | 23   | 3.9        | 39   |
| Aichi        | 79.3 (79.1–79.5)         | 26   | 85.2 (85.0–85.5)        | 20   | 5.9        | 13   | 69.5 (66.6–72.0)                 | 26   | 73.9 (70.6–76.8)        | 21   | 4.4        | 17   |
| Mie          | 79.3 (79.1–79.6)         | 29   | 85.2 (84.8–85.7)        | 23   | 5.9        | 12   | 69.4 (66.5–71.9)                 | 31   | 73.9 (70.7–76.8)        | 22   | 4.5        | 12   |
| Shiga        | 79.4 (79.2–79.7)         | 21   | 86.3 (85.9–86.7)        | 1    | 6.8        | 1    | 69.5 (66.6–72.0)                 | 18   | 74.7 (71.3–77.6)        | 1    | 5.2        | 1    |
| Kyoto        | 79.6 (79.4–79.9)         | 15   | 86.0 (85.6–86.4)        | 3    | 6.4        | 5    | 69.8 (66.9–72.2)                 | 13   | 74.6 (71.3–77.4)        | 2    | 4.8        | 5    |
| Osaka        | 78.2 (78.1–78.4)         | 47   | 84.7 (84.5–84.9)        | 35   | 6.5        | 4    | 68.7 (65.9–71.1)                 | 46   | 73.7 (70.5–76.5)        | 30   | 5.0        | 2    |
| Hyogo        | 78.9 (78.7–79.1)         | 42   | 85.4 (85.2–85.7)        | 15   | 6.5        | 3    | 69.1 (66.3–71.5)                 | 40   | 74.1 (70.8–77.0)        | 15   | 5.0        | 3    |
| Nara         | 79.3 (79.0–79.5)         | 32   | 85.6 (85.1–86.1)        | 9    | 6.3        | 6    | 69.5 (66.6–72.0)                 | 25   | 74.3 (71.0–77.0)        | 7    | 4.8        | 6    |

|           |                  |    |                  |    |     |    |                  |    |                  |    |     |    |
|-----------|------------------|----|------------------|----|-----|----|------------------|----|------------------|----|-----|----|
| Wakayama  | 78.8 (78.5–79.1) | 44 | 84.6 (84.1–85.1) | 38 | 5.8 | 17 | 69.0 (66.1–71.4) | 44 | 73.4 (70.1–76.2) | 40 | 4.4 | 20 |
| Tottori   | 79.3 (78.9–79.6) | 30 | 84.9 (84.3–85.4) | 30 | 5.6 | 29 | 69.4 (66.6–71.9) | 29 | 73.7 (70.4–76.6) | 27 | 4.3 | 27 |
| Shimane   | 80.3 (79.9–80.6) | 3  | 85.8 (85.2–86.3) | 6  | 5.5 | 32 | 70.1 (67.2–72.6) | 3  | 74.3 (70.9–77.2) | 8  | 4.1 | 34 |
| Okayama   | 79.8 (79.6–80.1) | 9  | 85.8 (85.4–86.2) | 5  | 5.9 | 11 | 69.8 (66.8–72.3) | 14 | 74.3 (71.1–77.2) | 5  | 4.6 | 10 |
| Hiroshima | 79.5 (79.3–79.7) | 18 | 85.7 (85.3–86.1) | 7  | 6.2 | 8  | 69.5 (66.7–72.1) | 19 | 74.3 (71.0–77.2) | 6  | 4.8 | 7  |
| Yamaguchi | 79.3 (79.1–79.6) | 25 | 84.8 (84.4–85.3) | 33 | 5.5 | 31 | 69.4 (66.5–71.9) | 30 | 73.6 (70.3–76.4) | 32 | 4.2 | 31 |
| Tokushima | 79.0 (78.7–79.3) | 40 | 84.3 (83.8–84.8) | 44 | 5.3 | 40 | 69.1 (66.2–71.5) | 41 | 73.2 (69.8–76.0) | 45 | 4.1 | 37 |
| Kagawa    | 79.7 (79.4–80.0) | 13 | 85.4 (85.0–85.9) | 16 | 5.7 | 19 | 69.7 (66.8–72.3) | 15 | 74.1 (70.7–77.0) | 14 | 4.5 | 14 |
| Ehime     | 79.5 (79.2–79.7) | 20 | 85.0 (84.5–85.5) | 26 | 5.5 | 30 | 69.5 (66.5–72.0) | 27 | 73.7 (70.5–76.5) | 28 | 4.3 | 28 |
| Kochi     | 79.2 (78.9–79.5) | 34 | 84.9 (84.4–85.4) | 29 | 5.7 | 23 | 69.2 (66.3–71.7) | 37 | 73.6 (70.4–76.4) | 33 | 4.4 | 21 |
| Fukuoka   | 79.1 (78.9–79.2) | 38 | 85.2 (85.0–85.5) | 21 | 6.2 | 9  | 69.0 (66.1–71.5) | 43 | 73.7 (70.3–76.5) | 29 | 4.7 | 8  |
| Saga      | 79.4 (79.1–79.7) | 24 | 85.3 (84.8–85.8) | 18 | 5.9 | 15 | 69.5 (66.6–72.1) | 23 | 74.0 (70.7–76.9) | 16 | 4.6 | 11 |
| Nagasaki  | 79.1 (78.8–79.4) | 35 | 84.6 (84.1–85.1) | 37 | 5.5 | 33 | 69.4 (66.5–71.9) | 32 | 73.5 (70.3–76.3) | 37 | 4.1 | 36 |
| Kumamoto  | 80.0 (79.7–80.2) | 5  | 85.7 (85.2–86.1) | 8  | 5.7 | 24 | 69.9 (66.9–72.4) | 8  | 74.2 (70.9–77.2) | 10 | 4.4 | 22 |
| Oita      | 79.4 (79.1–79.7) | 22 | 86.0 (85.5–86.4) | 4  | 6.5 | 2  | 69.4 (66.6–71.9) | 28 | 74.4 (71.1–77.4) | 4  | 5.0 | 4  |
| Miyazaki  | 79.3 (79.0–79.6) | 31 | 84.6 (84.1–85.1) | 36 | 5.4 | 37 | 69.3 (66.4–71.8) | 33 | 73.5 (70.3–76.3) | 36 | 4.2 | 32 |
| Kagoshima | 79.1 (78.8–79.4) | 36 | 84.8 (84.4–85.3) | 32 | 5.7 | 21 | 69.3 (66.4–71.8) | 36 | 73.7 (70.5–76.6) | 31 | 4.4 | 19 |
| Okinawa   | 80.6 (80.3–80.8) | 1  | 84.8 (84.3–85.3) | 34 | 4.2 | 47 | 70.3 (67.3–73.0) | 1  | 73.6 (70.3–76.4) | 35 | 3.3 | 47 |

UI: uncertainty interval. Prefectures are ordered according to their ISO codes. The rankings are assigned among the 47 prefectures, with values allocated in descending order from the highest to the lowest.

**Table S3: Life expectancy and healthy life expectancy at birth (years) in Japan and 47 prefectures, 1990 and 2021, for females**

| Prefecture   | Life expectancy (95% UI) |      |                         |      |            |      | Healthy life expectancy (95% UI) |      |                         |      |            |      |
|--------------|--------------------------|------|-------------------------|------|------------|------|----------------------------------|------|-------------------------|------|------------|------|
|              | 1990                     | Rank | 2021                    | Rank | Increase   | Rank | 1990                             | Rank | 2021                    | Rank | Increase   | Rank |
| <b>Japan</b> | <b>82.3 (82.2–82.3)</b>  |      | <b>88.1 (88.0–88.2)</b> |      | <b>5.8</b> |      | <b>71.2 (67.9–74.0)</b>          |      | <b>75.4 (71.6–78.7)</b> |      | <b>4.3</b> |      |
| Hokkaido     | 82.2 (82.0–82.5)         | 29   | 87.5 (87.1–87.9)        | 40   | 5.3        | 39   | 71.2 (67.8–74.0)                 | 29   | 74.9 (71.4–78.1)        | 40   | 3.8        | 38   |
| Aomori       | 81.9 (81.5–82.2)         | 43   | 86.9 (86.3–87.5)        | 46   | 5.0        | 43   | 70.8 (67.6–73.6)                 | 44   | 74.4 (70.7–77.4)        | 47   | 3.6        | 44   |
| Iwate        | 82.1 (81.8–82.5)         | 32   | 87.3 (86.8–87.9)        | 44   | 5.2        | 41   | 71.2 (67.9–73.9)                 | 28   | 74.9 (71.2–78.0)        | 42   | 3.7        | 43   |
| Miyagi       | 82.3 (82.0–82.6)         | 28   | 88.2 (87.7–88.7)        | 21   | 5.9        | 17   | 71.2 (68.0–74.0)                 | 26   | 75.4 (71.6–78.6)        | 22   | 4.2        | 24   |
| Akita        | 82.0 (81.7–82.3)         | 36   | 86.8 (86.2–87.4)        | 47   | 4.8        | 46   | 71.1 (67.9–73.8)                 | 30   | 74.5 (70.9–77.7)        | 46   | 3.4        | 46   |
| Yamagata     | 82.6 (82.2–82.9)         | 16   | 87.8 (87.2–88.4)        | 36   | 5.2        | 40   | 71.5 (68.2–74.4)                 | 11   | 75.3 (71.6–78.3)        | 36   | 3.7        | 41   |
| Fukushima    | 82.3 (82.0–82.7)         | 27   | 87.4 (86.8–87.9)        | 43   | 5.0        | 42   | 71.5 (68.2–74.2)                 | 14   | 75.0 (71.4–78.1)        | 39   | 3.5        | 45   |
| Ibaraki      | 81.8 (81.4–82.0)         | 45   | 87.4 (86.9–87.9)        | 42   | 5.7        | 27   | 70.7 (67.4–73.6)                 | 45   | 74.8 (71.2–78.0)        | 44   | 4.1        | 30   |
| Tochigi      | 81.4 (81.1–81.7)         | 46   | 87.4 (86.9–87.9)        | 41   | 6.0        | 14   | 70.5 (67.3–73.4)                 | 46   | 74.9 (71.3–78.1)        | 41   | 4.4        | 13   |
| Gunma        | 82.1 (81.7–82.4)         | 35   | 87.5 (87.0–88.0)        | 39   | 5.5        | 32   | 70.9 (67.7–73.7)                 | 39   | 74.8 (71.0–78.0)        | 43   | 3.9        | 36   |
| Saitama      | 82.0 (81.7–82.2)         | 38   | 87.8 (87.5–88.2)        | 34   | 5.9        | 20   | 71.0 (67.7–73.8)                 | 35   | 75.3 (71.6–78.4)        | 35   | 4.3        | 20   |
| Chiba        | 82.6 (82.3–82.8)         | 18   | 88.1 (87.8–88.5)        | 22   | 5.6        | 29   | 71.4 (68.0–74.2)                 | 20   | 75.4 (71.6–78.6)        | 29   | 4.0        | 31   |
| Tokyo        | 82.2 (82.0–82.4)         | 30   | 88.5 (88.3–88.8)        | 11   | 6.3        | 7    | 70.8 (67.5–73.7)                 | 42   | 75.4 (71.5–78.8)        | 23   | 4.6        | 7    |
| Kanagawa     | 82.5 (82.3–82.7)         | 20   | 88.3 (88.1–88.6)        | 15   | 5.9        | 19   | 71.4 (68.0–74.2)                 | 21   | 75.7 (71.9–78.8)        | 14   | 4.3        | 18   |
| Niigata      | 82.7 (82.4–83.0)         | 10   | 88.0 (87.4–88.5)        | 30   | 5.3        | 38   | 71.6 (68.3–74.3)                 | 8    | 75.3 (71.4–78.5)        | 32   | 3.7        | 42   |
| Toyama       | 82.9 (82.5–83.2)         | 6    | 88.8 (88.1–89.4)        | 8    | 5.9        | 18   | 71.7 (68.3–74.5)                 | 4    | 76.0 (72.2–79.2)        | 7    | 4.3        | 19   |
| Ishikawa     | 82.7 (82.3–83.0)         | 12   | 88.3 (87.7–88.9)        | 16   | 5.7        | 25   | 71.4 (68.2–74.3)                 | 19   | 75.5 (71.8–78.7)        | 19   | 4.1        | 26   |
| Fukui        | 82.7 (82.3–83.2)         | 8    | 88.4 (87.7–89.1)        | 13   | 5.7        | 26   | 71.5 (68.1–74.4)                 | 15   | 75.6 (71.9–78.9)        | 17   | 4.1        | 27   |
| Yamanashi    | 82.6 (82.2–82.9)         | 14   | 88.6 (88.0–89.2)        | 10   | 6.0        | 13   | 71.4 (68.0–74.2)                 | 16   | 75.9 (72.3–79.0)        | 8    | 4.5        | 10   |
| Nagano       | 82.9 (82.6–83.2)         | 5    | 88.8 (88.3–89.2)        | 6    | 5.9        | 21   | 71.6 (68.3–74.5)                 | 6    | 75.9 (72.1–79.2)        | 10   | 4.2        | 23   |
| Gifu         | 82.0 (81.7–82.3)         | 39   | 88.0 (87.5–88.4)        | 29   | 6.0        | 10   | 71.0 (67.7–73.9)                 | 37   | 75.4 (71.8–78.5)        | 30   | 4.4        | 14   |
| Shizuoka     | 82.7 (82.4–83.0)         | 9    | 88.1 (87.6–88.6)        | 25   | 5.4        | 35   | 71.5 (68.2–74.4)                 | 9    | 75.4 (71.8–78.5)        | 28   | 3.8        | 37   |
| Aichi        | 81.9 (81.7–82.1)         | 40   | 88.0 (87.7–88.3)        | 28   | 6.1        | 9    | 70.9 (67.6–73.7)                 | 40   | 75.3 (71.6–78.6)        | 33   | 4.4        | 12   |
| Mie          | 82.2 (81.9–82.5)         | 31   | 88.1 (87.6–88.6)        | 24   | 5.9        | 16   | 71.1 (67.8–73.9)                 | 32   | 75.4 (71.8–78.7)        | 27   | 4.3        | 16   |
| Shiga        | 82.0 (81.7–82.3)         | 37   | 88.9 (88.4–89.4)        | 5    | 6.9        | 1    | 71.0 (67.7–73.7)                 | 36   | 76.0 (72.1–79.4)        | 5    | 5.0        | 1    |
| Kyoto        | 82.4 (82.0–82.7)         | 25   | 88.9 (88.4–89.4)        | 4    | 6.6        | 4    | 71.3 (68.0–74.2)                 | 23   | 76.1 (72.4–79.3)        | 4    | 4.8        | 4    |
| Osaka        | 81.2 (81.1–81.4)         | 47   | 88.0 (87.7–88.2)        | 31   | 6.7        | 3    | 70.5 (67.3–73.3)                 | 47   | 75.5 (72.0–78.8)        | 20   | 5.0        | 3    |
| Hyogo        | 81.9 (81.6–82.1)         | 42   | 88.4 (88.0–88.8)        | 14   | 6.5        | 5    | 70.8 (67.7–73.6)                 | 41   | 75.7 (71.9–78.9)        | 15   | 4.8        | 5    |
| Nara         | 81.9 (81.6–82.2)         | 41   | 88.3 (87.8–88.9)        | 17   | 6.4        | 6    | 71.0 (67.7–73.8)                 | 34   | 75.7 (72.1–78.9)        | 12   | 4.7        | 6    |

|           |                  |    |                  |    |     |    |                  |    |                  |    |     |    |
|-----------|------------------|----|------------------|----|-----|----|------------------|----|------------------|----|-----|----|
| Wakayama  | 81.8 (81.4–82.2) | 44 | 87.8 (87.2–88.4) | 37 | 6.0 | 15 | 70.8 (67.5–73.6) | 43 | 75.2 (71.4–78.4) | 38 | 4.4 | 15 |
| Tottori   | 82.6 (82.2–83.0) | 13 | 87.9 (87.3–88.6) | 32 | 5.3 | 36 | 71.5 (68.3–74.4) | 10 | 75.4 (71.6–78.7) | 21 | 3.9 | 33 |
| Shimane   | 83.8 (83.4–84.3) | 2  | 89.4 (88.7–90.1) | 1  | 5.6 | 30 | 72.5 (69.1–75.3) | 2  | 76.4 (72.5–79.7) | 1  | 4.0 | 32 |
| Okayama   | 82.9 (82.6–83.3) | 4  | 89.0 (88.4–89.5) | 3  | 6.0 | 11 | 71.7 (68.4–74.5) | 5  | 76.1 (72.4–79.3) | 3  | 4.5 | 11 |
| Hiroshima | 82.5 (82.2–82.8) | 21 | 88.7 (88.2–89.2) | 9  | 6.3 | 8  | 71.3 (68.0–74.2) | 25 | 75.9 (72.1–79.0) | 9  | 4.6 | 8  |
| Yamaguchi | 82.6 (82.2–82.9) | 17 | 87.9 (87.3–88.4) | 33 | 5.3 | 37 | 71.4 (68.1–74.2) | 17 | 75.3 (71.7–78.6) | 31 | 3.9 | 35 |
| Tokushima | 82.1 (81.7–82.5) | 33 | 87.1 (86.4–87.8) | 45 | 5.0 | 44 | 70.9 (67.6–73.7) | 38 | 74.7 (70.8–77.9) | 45 | 3.8 | 40 |
| Kagawa    | 82.8 (82.4–83.2) | 7  | 88.3 (87.6–88.9) | 19 | 5.5 | 33 | 71.6 (68.3–74.5) | 7  | 75.7 (71.8–79.0) | 13 | 4.1 | 28 |
| Ehime     | 82.5 (82.2–82.9) | 19 | 88.1 (87.4–88.7) | 26 | 5.5 | 31 | 71.3 (68.0–74.2) | 22 | 75.4 (71.8–78.5) | 25 | 4.1 | 29 |
| Kochi     | 82.5 (82.0–82.8) | 22 | 88.1 (87.4–88.8) | 27 | 5.6 | 28 | 71.3 (67.9–74.1) | 24 | 75.4 (71.7–78.8) | 26 | 4.1 | 25 |
| Fukuoka   | 82.4 (82.2–82.7) | 23 | 88.2 (87.8–88.6) | 20 | 5.8 | 22 | 71.0 (67.7–73.9) | 33 | 75.3 (71.4–78.6) | 34 | 4.3 | 21 |
| Saga      | 82.7 (82.2–83.1) | 11 | 88.5 (87.8–89.1) | 12 | 5.8 | 24 | 71.5 (68.2–74.4) | 13 | 75.8 (72.0–79.2) | 11 | 4.3 | 17 |
| Nagasaki  | 82.4 (82.1–82.7) | 24 | 87.8 (87.3–88.4) | 35 | 5.4 | 34 | 71.5 (68.3–74.2) | 12 | 75.4 (71.7–78.8) | 24 | 3.9 | 34 |
| Kumamoto  | 83.0 (82.6–83.3) | 3  | 88.8 (88.2–89.3) | 7  | 5.8 | 23 | 71.7 (68.4–74.5) | 3  | 76.0 (72.2–79.2) | 6  | 4.3 | 22 |
| Oita      | 82.3 (82.0–82.7) | 26 | 89.2 (88.6–89.8) | 2  | 6.9 | 2  | 71.2 (67.9–74.1) | 27 | 76.2 (72.3–79.7) | 2  | 5.0 | 2  |
| Miyazaki  | 82.6 (82.2–82.9) | 15 | 87.6 (87.0–88.2) | 38 | 5.0 | 45 | 71.4 (68.1–74.3) | 18 | 75.2 (71.5–78.4) | 37 | 3.8 | 39 |
| Kagoshima | 82.1 (81.8–82.4) | 34 | 88.1 (87.6–88.7) | 23 | 6.0 | 12 | 71.1 (67.8–73.9) | 31 | 75.6 (72.0–78.7) | 16 | 4.5 | 9  |
| Okinawa   | 84.2 (83.9–84.5) | 1  | 88.3 (87.7–88.9) | 18 | 4.1 | 47 | 72.5 (69.0–75.6) | 1  | 75.6 (71.7–78.9) | 18 | 3.1 | 47 |

UI: uncertainty interval. Prefectures are ordered according to their ISO codes. The rankings are assigned among the 47 prefectures, with values allocated in descending order from the highest to the lowest.

**Table S4: Life expectancy and healthy life expectancy at birth (years) in Japan and 47 prefectures, 1990 and 2021, for males**

| Prefecture   | Life expectancy (95% UI) |      |                         |      |            |      | Healthy life expectancy (95% UI) |      |                         |      |            |      |
|--------------|--------------------------|------|-------------------------|------|------------|------|----------------------------------|------|-------------------------|------|------------|------|
|              | 1990                     | Rank | 2021                    | Rank | Increase   | Rank | 1990                             | Rank | 2021                    | Rank | Increase   | Rank |
| <b>Japan</b> | <b>76.2 (76.2–76.3)</b>  |      | <b>82.2 (82.1–82.2)</b> |      | <b>5.9</b> |      | <b>67.6 (65.1–69.7)</b>          |      | <b>72.2 (69.4–74.7)</b> |      | <b>4.7</b> |      |
| Hokkaido     | 75.9 (75.7–76.1)         | 30   | 81.5 (81.1–81.9)        | 39   | 5.6        | 35   | 67.3 (64.9–69.4)                 | 29   | 71.7 (68.9–74.1)        | 39   | 4.4        | 35   |
| Aomori       | 74.5 (74.1–74.8)         | 47   | 79.8 (79.1–80.4)        | 47   | 5.3        | 42   | 66.0 (63.7–68.0)                 | 47   | 70.3 (67.5–72.6)        | 47   | 4.3        | 40   |
| Iwate        | 75.7 (75.3–76.1)         | 35   | 81.3 (80.6–81.9)        | 43   | 5.5        | 37   | 67.2 (64.8–69.3)                 | 33   | 71.5 (68.7–73.9)        | 43   | 4.2        | 41   |
| Miyagi       | 76.3 (76.0–76.6)         | 23   | 82.5 (81.9–83.0)        | 15   | 6.1        | 13   | 67.7 (65.2–69.8)                 | 19   | 72.4 (69.7–75.0)        | 15   | 4.8        | 18   |
| Akita        | 75.5 (75.1–75.9)         | 42   | 81.1 (80.2–81.8)        | 46   | 5.6        | 36   | 67.1 (64.8–69.2)                 | 38   | 71.4 (68.5–73.9)        | 45   | 4.3        | 37   |
| Yamagata     | 76.7 (76.3–77.1)         | 9    | 82.0 (81.3–82.7)        | 26   | 5.3        | 43   | 68.0 (65.5–70.1)                 | 7    | 72.2 (69.4–74.7)        | 23   | 4.2        | 43   |
| Fukushima    | 76.0 (75.6–76.3)         | 29   | 81.1 (80.6–81.7)        | 45   | 5.2        | 44   | 67.3 (64.8–69.5)                 | 30   | 71.4 (68.5–73.8)        | 46   | 4.0        | 44   |
| Ibaraki      | 75.8 (75.6–76.1)         | 31   | 81.7 (81.2–82.1)        | 34   | 5.8        | 25   | 67.2 (64.7–69.3)                 | 34   | 71.7 (68.9–74.3)        | 37   | 4.6        | 28   |
| Tochigi      | 75.6 (75.3–76.0)         | 38   | 81.8 (81.2–82.3)        | 30   | 6.1        | 15   | 67.1 (64.6–69.2)                 | 39   | 71.9 (69.1–74.4)        | 30   | 4.8        | 14   |
| Gunma        | 76.7 (76.4–77.1)         | 10   | 81.8 (81.2–82.3)        | 31   | 5.0        | 46   | 68.0 (65.5–70.1)                 | 11   | 71.9 (69.0–74.4)        | 32   | 3.9        | 47   |
| Saitama      | 76.5 (76.3–76.8)         | 15   | 82.2 (81.8–82.5)        | 21   | 5.6        | 33   | 67.9 (65.4–70.0)                 | 13   | 72.3 (69.4–74.7)        | 21   | 4.4        | 34   |
| Chiba        | 76.7 (76.5–77.0)         | 8    | 82.3 (81.9–82.6)        | 20   | 5.5        | 38   | 68.1 (65.6–70.2)                 | 6    | 72.3 (69.5–74.7)        | 19   | 4.3        | 39   |
| Tokyo        | 76.3 (76.1–76.4)         | 25   | 82.5 (82.2–82.7)        | 14   | 6.2        | 10   | 67.5 (65.0–69.7)                 | 27   | 72.4 (69.4–74.9)        | 18   | 4.9        | 12   |
| Kanagawa     | 76.8 (76.6–77.0)         | 5    | 82.8 (82.5–83.1)        | 4    | 6.0        | 18   | 68.2 (65.7–70.3)                 | 4    | 72.9 (70.0–75.2)        | 4    | 4.7        | 19   |
| Niigata      | 76.7 (76.4–77.1)         | 6    | 81.8 (81.2–82.3)        | 29   | 5.0        | 47   | 68.0 (65.4–70.1)                 | 10   | 71.9 (68.9–74.4)        | 31   | 3.9        | 46   |
| Toyama       | 76.5 (76.1–76.9)         | 18   | 82.1 (81.4–82.8)        | 24   | 5.6        | 34   | 67.8 (65.3–70.0)                 | 15   | 72.2 (69.6–74.7)        | 22   | 4.4        | 33   |
| Ishikawa     | 76.7 (76.4–77.1)         | 7    | 82.7 (82.1–83.3)        | 6    | 6.0        | 19   | 68.0 (65.5–70.1)                 | 9    | 72.6 (69.9–75.1)        | 8    | 4.7        | 20   |
| Fukui        | 77.2 (76.7–77.6)         | 2    | 82.7 (81.9–83.4)        | 8    | 5.5        | 40   | 68.3 (65.8–70.5)                 | 2    | 72.7 (69.9–75.1)        | 7    | 4.3        | 36   |
| Yamanashi    | 76.3 (75.9–76.7)         | 24   | 82.1 (81.3–82.9)        | 23   | 5.8        | 29   | 67.6 (65.1–69.8)                 | 23   | 72.2 (69.4–74.8)        | 24   | 4.6        | 25   |
| Nagano       | 77.6 (77.3–77.9)         | 1    | 83.5 (82.9–84.1)        | 2    | 5.9        | 22   | 68.6 (66.0–70.8)                 | 1    | 73.1 (70.1–75.6)        | 2    | 4.5        | 30   |
| Gifu         | 77.0 (76.6–77.3)         | 3    | 82.5 (81.9–83.1)        | 13   | 5.5        | 39   | 68.2 (65.7–70.4)                 | 3    | 72.5 (69.7–75.1)        | 9    | 4.3        | 38   |
| Shizuoka     | 76.9 (76.6–77.2)         | 4    | 82.4 (81.9–82.8)        | 18   | 5.5        | 41   | 68.1 (65.7–70.2)                 | 5    | 72.3 (69.5–74.9)        | 20   | 4.2        | 42   |
| Aichi        | 76.6 (76.4–76.8)         | 12   | 82.6 (82.3–82.9)        | 10   | 6.0        | 20   | 67.9 (65.4–70.0)                 | 12   | 72.5 (69.7–75.0)        | 11   | 4.6        | 22   |
| Mie          | 76.2 (75.8–76.5)         | 27   | 82.4 (81.8–82.9)        | 19   | 6.2        | 11   | 67.5 (65.1–69.6)                 | 25   | 72.4 (69.5–75.0)        | 16   | 4.9        | 11   |
| Shiga        | 76.6 (76.2–76.9)         | 11   | 83.7 (83.0–84.3)        | 1    | 7.1        | 1    | 67.9 (65.4–70.0)                 | 14   | 73.4 (70.4–75.9)        | 1    | 5.5        | 1    |
| Kyoto        | 76.6 (76.2–76.9)         | 13   | 83.0 (82.4–83.5)        | 3    | 6.4        | 4    | 68.0 (65.6–70.1)                 | 8    | 73.0 (70.2–75.4)        | 3    | 5.0        | 8    |
| Osaka        | 75.1 (74.9–75.3)         | 46   | 81.4 (81.2–81.8)        | 40   | 6.4        | 5    | 66.7 (64.4–68.8)                 | 46   | 71.8 (69.1–74.2)        | 34   | 5.1        | 4    |
| Hyogo        | 75.7 (75.5–75.9)         | 36   | 82.4 (82.0–82.8)        | 17   | 6.7        | 2    | 67.2 (64.7–69.3)                 | 35   | 72.5 (69.7–75.0)        | 14   | 5.3        | 2    |
| Nara         | 76.4 (76.0–76.8)         | 20   | 82.7 (82.1–83.4)        | 5    | 6.4        | 7    | 67.8 (65.3–70.0)                 | 16   | 72.8 (69.9–75.4)        | 5    | 5.0        | 6    |

|           |                  |    |                  |    |     |    |                  |    |                  |    |     |    |
|-----------|------------------|----|------------------|----|-----|----|------------------|----|------------------|----|-----|----|
| Wakayama  | 75.5 (75.1–75.9) | 44 | 81.3 (80.6–82.0) | 42 | 5.8 | 26 | 67.0 (64.6–69.1) | 42 | 71.5 (68.6–74.0) | 42 | 4.5 | 29 |
| Tottori   | 75.6 (75.2–76.0) | 39 | 81.8 (81.0–82.6) | 32 | 6.1 | 14 | 67.1 (64.7–69.2) | 37 | 71.9 (69.0–74.4) | 29 | 4.8 | 13 |
| Shimane   | 76.5 (76.0–76.9) | 17 | 82.1 (81.4–83.0) | 22 | 5.7 | 32 | 67.6 (65.1–69.8) | 22 | 72.1 (69.3–74.7) | 26 | 4.5 | 32 |
| Okayama   | 76.5 (76.1–76.8) | 16 | 82.6 (82.0–83.2) | 9  | 6.1 | 16 | 67.7 (65.1–69.9) | 18 | 72.5 (69.8–75.1) | 10 | 4.8 | 15 |
| Hiroshima | 76.3 (76.0–76.7) | 21 | 82.7 (82.2–83.2) | 7  | 6.3 | 8  | 67.6 (65.2–69.8) | 21 | 72.7 (69.8–75.2) | 6  | 5.0 | 5  |
| Yamaguchi | 75.8 (75.4–76.2) | 32 | 81.7 (81.0–82.3) | 35 | 5.8 | 24 | 67.2 (64.7–69.4) | 32 | 71.8 (68.9–74.4) | 33 | 4.6 | 23 |
| Tokushima | 75.7 (75.2–76.1) | 37 | 81.4 (80.7–82.1) | 41 | 5.7 | 31 | 67.0 (64.6–69.0) | 40 | 71.6 (68.8–74.2) | 41 | 4.6 | 26 |
| Kagawa    | 76.3 (75.9–76.7) | 22 | 82.5 (81.8–83.2) | 12 | 6.2 | 12 | 67.6 (65.0–69.8) | 24 | 72.5 (69.5–74.9) | 13 | 4.9 | 9  |
| Ehime     | 76.1 (75.7–76.5) | 28 | 81.8 (81.1–82.5) | 28 | 5.7 | 30 | 67.4 (64.9–69.6) | 28 | 72.0 (69.1–74.5) | 28 | 4.6 | 27 |
| Kochi     | 75.6 (75.2–76.1) | 41 | 81.7 (80.9–82.4) | 33 | 6.1 | 17 | 67.0 (64.6–69.1) | 41 | 71.8 (69.0–74.2) | 35 | 4.8 | 16 |
| Fukuoka   | 75.4 (75.2–75.6) | 45 | 82.0 (81.7–82.4) | 25 | 6.6 | 3  | 66.8 (64.4–68.9) | 45 | 72.0 (69.2–74.4) | 27 | 5.2 | 3  |
| Saga      | 75.8 (75.3–76.2) | 33 | 82.0 (81.2–82.8) | 27 | 6.2 | 9  | 67.2 (64.7–69.5) | 31 | 72.2 (69.3–74.7) | 25 | 4.9 | 10 |
| Nagasaki  | 75.5 (75.1–75.9) | 43 | 81.3 (80.6–82.0) | 44 | 5.8 | 28 | 67.0 (64.5–69.1) | 44 | 71.5 (68.7–73.8) | 44 | 4.5 | 31 |
| Kumamoto  | 76.6 (76.2–76.9) | 14 | 82.4 (81.8–83.0) | 16 | 5.9 | 23 | 67.7 (65.2–69.9) | 17 | 72.4 (69.5–74.9) | 17 | 4.6 | 21 |
| Oita      | 76.2 (75.8–76.6) | 26 | 82.5 (81.9–83.2) | 11 | 6.4 | 6  | 67.5 (65.0–69.6) | 26 | 72.5 (69.7–75.0) | 12 | 5.0 | 7  |
| Miyazaki  | 75.6 (75.2–76.1) | 40 | 81.5 (80.8–82.2) | 36 | 5.9 | 21 | 67.0 (64.6–69.1) | 43 | 71.7 (69.1–74.2) | 36 | 4.8 | 17 |
| Kagoshima | 75.7 (75.4–76.1) | 34 | 81.5 (80.9–82.2) | 37 | 5.8 | 27 | 67.1 (64.7–69.5) | 36 | 71.7 (69.0–74.3) | 38 | 4.6 | 24 |
| Okinawa   | 76.4 (76.0–76.9) | 19 | 81.5 (80.9–82.1) | 38 | 5.1 | 45 | 67.7 (65.1–70.0) | 20 | 71.6 (68.8–74.1) | 40 | 4.0 | 45 |

UI: uncertainty interval. Prefectures are ordered according to their ISO codes. The rankings are assigned among the 47 prefectures, with values allocated in descending order from the highest to the lowest.

**Table S5: Age-standardised mortality and DALY rates per 100,000 population in Japan and 47 Prefectures: 1990 and 2021 values with percent change (%), for both sexes**

| Prefecture   | Age-standardised mortality rate per 100,000 (95% UI) |      |                            |      |                                          | Age-standardised DALY rate per 100,000 (95% UI) |                                  |      |                                  |      |                                          |      |
|--------------|------------------------------------------------------|------|----------------------------|------|------------------------------------------|-------------------------------------------------|----------------------------------|------|----------------------------------|------|------------------------------------------|------|
|              | 1990                                                 | Rank | 2021                       | Rank | Percent change between 1990 and 2021 (%) | Rank                                            | 1990                             | Rank | 2021                             | Rank | Percent change between 1990 and 2021 (%) | Rank |
| <b>Japan</b> | <b>529.3 (527.5–531.0)</b>                           |      | <b>311.1 (309.5–312.6)</b> |      | <b>-41.2</b>                             |                                                 | <b>21449.6 (19032.9–24332.4)</b> |      | <b>16186.7 (13729.3–18997.2)</b> |      | <b>-24.5</b>                             |      |
| Hokkaido     | 535.7 (527.6–543.5)                                  | 31   | 328.7 (319.1–337.6)        | 40   | -38.6                                    | 36                                              | 21788.5 (19419.8–24661.9)        | 34   | 16820.3 (14491.1–19561.2)        | 40   | -22.8                                    | 37   |
| Aomori       | 570.7 (558.2–584.7)                                  | 46   | 369.1 (353.6–384.4)        | 47   | -35.3                                    | 46                                              | 23128.7 (20739.2–26004.1)        | 47   | 17935.0 (15519.0–20797.4)        | 47   | -22.5                                    | 39   |
| Iwate        | 542.0 (530.2–554.4)                                  | 39   | 336.5 (321.9–352.1)        | 43   | -37.9                                    | 38                                              | 21851.3 (19502.1–24828.4)        | 35   | 16927.3 (14497.8–19684.7)        | 43   | -22.5                                    | 38   |
| Miyagi       | 532.7 (521.2–544.3)                                  | 28   | 305.4 (293.7–316.6)        | 15   | -42.7                                    | 11                                              | 21278.2 (18845.8–24118.7)        | 19   | 16154.1 (13708.5–18928.8)        | 21   | -24.1                                    | 28   |
| Akita        | 554.7 (540.9–568.7)                                  | 42   | 346.2 (328.0–363.6)        | 46   | -37.6                                    | 42                                              | 21923.9 (19508.7–24642.8)        | 38   | 17144.8 (14742.0–19967.5)        | 46   | -21.8                                    | 43   |
| Yamagata     | 514.8 (502.1–528.4)                                  | 13   | 320.5 (306.8–336.7)        | 33   | -37.7                                    | 41                                              | 20770.6 (18436.9–23627.3)        | 3    | 16502.6 (14096.2–19319.3)        | 32   | -20.5                                    | 46   |
| Fukushima    | 530.5 (519.4–541.8)                                  | 27   | 341.1 (329.1–354.7)        | 45   | -35.7                                    | 45                                              | 21653.9 (19209.7–24479.6)        | 30   | 17038.1 (14614.2–19790.9)        | 45   | -21.3                                    | 44   |
| Ibaraki      | 556.2 (545.8–566.8)                                  | 43   | 331.1 (321.1–342.7)        | 42   | -40.5                                    | 24                                              | 22148.7 (19713.7–25106.6)        | 43   | 16838.1 (14357.9–19773.7)        | 41   | -24.0                                    | 29   |
| Tochigi      | 565.5 (554.0–576.7)                                  | 45   | 330.1 (318.8–342.1)        | 41   | -41.6                                    | 16                                              | 22394.3 (19960.7–25208.4)        | 45   | 16710.5 (14309.3–19471.6)        | 38   | -25.4                                    | 13   |
| Gunma        | 529.5 (518.7–541.8)                                  | 25   | 328.7 (317.0–340.9)        | 39   | -37.9                                    | 37                                              | 21291.9 (18864.2–24125.3)        | 20   | 16631.4 (14131.9–19506.8)        | 36   | -21.9                                    | 42   |
| Saitama      | 535.9 (528.0–544.2)                                  | 32   | 317.6 (309.5–325.4)        | 27   | -40.7                                    | 22                                              | 21195.8 (18773.6–24028.0)        | 16   | 16166.6 (13779.6–18954.7)        | 23   | -23.7                                    | 32   |
| Chiba        | 516.9 (508.6–525.3)                                  | 14   | 311.1 (304.1–318.6)        | 25   | -39.8                                    | 28                                              | 20822.9 (18395.8–23702.0)        | 6    | 16165.8 (13809.8–18955.3)        | 22   | -22.4                                    | 40   |
| Tokyo        | 534.5 (528.7–540.1)                                  | 29   | 300.9 (296.0–306.0)        | 10   | -43.7                                    | 7                                               | 21612.6 (19157.5–24488.8)        | 28   | 16053.1 (13516.6–18934.3)        | 18   | -25.7                                    | 10   |
| Kanagawa     | 514.2 (507.4–521.3)                                  | 12   | 298.9 (292.7–306.6)        | 9    | -41.9                                    | 15                                              | 20842.8 (18400.0–23651.1)        | 7    | 15740.3 (13391.5–18586.7)        | 4    | -24.5                                    | 19   |
| Niigata      | 512.5 (500.4–523.6)                                  | 11   | 318.9 (306.8–331.4)        | 30   | -37.8                                    | 39                                              | 20812.1 (18433.3–23708.4)        | 5    | 16379.2 (13926.6–19258.8)        | 28   | -21.3                                    | 45   |
| Toyama       | 505.8 (494.2–518.7)                                  | 7    | 305.9 (291.2–319.7)        | 17   | -39.5                                    | 31                                              | 21091.1 (18635.4–23956.7)        | 12   | 15976.8 (13544.6–18606.4)        | 15   | -24.2                                    | 23   |
| Ishikawa     | 509.7 (497.8–522.0)                                  | 9    | 301.5 (288.4–315.3)        | 12   | -40.8                                    | 20                                              | 20947.9 (18535.7–23786.4)        | 9    | 15788.1 (13411.1–18472.1)        | 6    | -24.6                                    | 18   |
| Fukui        | 496.0 (483.3–509.4)                                  | 4    | 301.1 (285.5–317.9)        | 11   | -39.3                                    | 32                                              | 20732.9 (18255.4–23676.7)        | 2    | 15843.6 (13489.3–18622.4)        | 10   | -23.6                                    | 33   |
| Yamanashi    | 519.2 (506.6–533.4)                                  | 16   | 307.3 (292.5–323.1)        | 18   | -40.8                                    | 21                                              | 21446.3 (19082.0–24341.4)        | 24   | 16133.7 (13671.5–18800.6)        | 20   | -24.8                                    | 16   |
| Nagano       | 487.5 (476.7–498.1)                                  | 3    | 281.1 (270.6–292.5)        | 2    | -42.3                                    | 14                                              | 20392.0 (17928.2–23177.0)        | 1    | 15662.6 (13199.7–18391.2)        | 3    | -23.2                                    | 35   |
| Gifu         | 527.9 (517.0–539.1)                                  | 23   | 308.2 (296.2–320.3)        | 22   | -41.6                                    | 17                                              | 21019.3 (18506.4–23878.5)        | 10   | 15929.1 (13426.0–18674.9)        | 13   | -24.2                                    | 26   |
| Shizuoka     | 504.7 (496.0–513.4)                                  | 6    | 309.1 (299.7–318.6)        | 24   | -38.8                                    | 35                                              | 20792.4 (18384.2–23596.0)        | 4    | 16172.0 (13753.4–18951.1)        | 24   | -22.2                                    | 41   |
| Aichi        | 539.9 (531.9–547.8)                                  | 37   | 307.4 (300.2–315.0)        | 19   | -43.1                                    | 9                                               | 21232.0 (18826.8–24053.0)        | 17   | 15891.2 (13457.1–18709.5)        | 11   | -25.2                                    | 15   |

|           |                     |    |                     |    |       |    |                           |    |                           |    |       |    |
|-----------|---------------------|----|---------------------|----|-------|----|---------------------------|----|---------------------------|----|-------|----|
| Mie       | 538.3 (525.7–550.3) | 35 | 309.1 (295.9–322.9) | 23 | -42.6 | 12 | 21560.2 (19005.4–24382.7) | 25 | 15995.9 (13514.6–18755.4) | 16 | -25.8 | 9  |
| Shiga     | 538.9 (525.9–551.9) | 36 | 274.8 (263.2–287.0) | 1  | -49.0 | 1  | 21267.4 (18805.7–24156.1) | 18 | 15378.1 (12922.9–18253.5) | 1  | -27.7 | 1  |
| Kyoto     | 518.4 (507.6–529.3) | 15 | 288.5 (278.9–298.6) | 4  | -44.4 | 5  | 21093.1 (18680.6–23930.8) | 13 | 15614.4 (13230.1–18372.0) | 2  | -26.0 | 7  |
| Osaka     | 584.9 (577.6–591.9) | 47 | 325.8 (319.1–332.3) | 35 | -44.3 | 6  | 22564.1 (20130.9–25386.0) | 46 | 16380.2 (13977.7–19200.8) | 29 | -27.4 | 2  |
| Hyogo     | 553.7 (545.8–561.9) | 41 | 301.8 (293.6–309.3) | 13 | -45.5 | 2  | 21920.8 (19530.1–24727.0) | 37 | 15924.0 (13489.7–18633.8) | 12 | -27.4 | 3  |
| Nara      | 542.2 (529.3–555.3) | 40 | 296.3 (283.5–310.1) | 8  | -45.4 | 4  | 21333.8 (18809.3–24176.8) | 21 | 15818.5 (13422.9–18646.2) | 8  | -25.9 | 8  |
| Wakayama  | 559.5 (546.3–574.5) | 44 | 327.7 (313.1–342.4) | 38 | -41.4 | 18 | 22222.0 (19723.6–25118.6) | 44 | 16573.0 (14054.1–19515.9) | 33 | -25.4 | 11 |
| Tottori   | 529.9 (516.5–545.0) | 26 | 318.1 (302.2–335.3) | 29 | -40.0 | 27 | 21644.6 (19215.4–24502.5) | 29 | 16358.3 (13943.1–19246.8) | 27 | -24.4 | 20 |
| Shimane   | 483.9 (471.1–497.5) | 2  | 302.0 (286.4–317.3) | 14 | -37.6 | 43 | 20921.3 (18519.5–23804.1) | 8  | 16033.0 (13568.1–18818.0) | 17 | -23.4 | 34 |
| Okayama   | 507.3 (495.1–519.3) | 8  | 291.7 (280.7–303.0) | 5  | -42.5 | 13 | 21149.3 (18687.7–24071.5) | 15 | 15794.9 (13413.5–18561.1) | 7  | -25.3 | 14 |
| Hiroshima | 522.8 (512.8–533.0) | 19 | 294.4 (283.4–305.2) | 6  | -43.7 | 8  | 21421.4 (18916.0–24192.0) | 23 | 15755.6 (13318.4–18584.6) | 5  | -26.4 | 5  |
| Yamaguchi | 528.2 (516.7–541.0) | 24 | 319.0 (305.1–333.3) | 31 | -39.6 | 30 | 21669.1 (19223.7–24553.4) | 31 | 16435.9 (14063.6–19272.9) | 31 | -24.2 | 27 |
| Tokushima | 540.0 (526.4–554.1) | 38 | 340.4 (324.1–357.4) | 44 | -37.0 | 44 | 22120.3 (19693.6–24986.1) | 41 | 16854.2 (14309.5–19846.0) | 42 | -23.8 | 31 |
| Kagawa    | 510.2 (498.0–523.3) | 10 | 305.5 (292.2–318.9) | 16 | -40.1 | 26 | 21349.5 (18766.4–24187.0) | 22 | 16085.3 (13730.4–18964.1) | 19 | -24.7 | 17 |
| Ehime     | 520.5 (508.1–533.3) | 17 | 316.0 (301.9–332.0) | 26 | -39.3 | 33 | 21599.4 (19089.0–24433.4) | 27 | 16421.6 (13973.8–19158.6) | 30 | -24.0 | 30 |
| Kochi     | 526.7 (512.9–539.6) | 21 | 317.9 (302.0–334.4) | 28 | -39.7 | 29 | 22101.2 (19669.3–24978.4) | 40 | 16718.5 (14313.8–19523.7) | 39 | -24.4 | 21 |
| Fukuoka   | 537.0 (529.2–545.7) | 34 | 307.8 (299.8–315.6) | 21 | -42.7 | 10 | 22130.3 (19671.1–25044.6) | 42 | 16307.9 (13881.0–19246.5) | 26 | -26.3 | 6  |
| Saga      | 521.0 (507.0–535.0) | 18 | 307.6 (293.4–323.9) | 20 | -40.9 | 19 | 21697.3 (19119.7–24554.3) | 32 | 16185.4 (13676.9–19061.1) | 25 | -25.4 | 12 |
| Nagasaki  | 536.5 (524.9–550.1) | 33 | 326.4 (311.7–341.3) | 37 | -39.2 | 34 | 21721.9 (19297.1–24613.7) | 33 | 16691.4 (14289.6–19457.1) | 37 | -23.2 | 36 |
| Kumamoto  | 497.7 (486.6–509.3) | 5  | 296.0 (283.8–308.9) | 7  | -40.5 | 23 | 21029.6 (18618.2–23970.7) | 11 | 15931.5 (13427.6–18750.8) | 14 | -24.2 | 24 |
| Oita      | 527.0 (515.0–539.5) | 22 | 287.9 (275.1–301.5) | 3  | -45.4 | 3  | 21560.6 (19089.9–24428.7) | 26 | 15835.0 (13368.6–18681.7) | 9  | -26.6 | 4  |
| Miyazaki  | 523.4 (509.7–537.4) | 20 | 325.8 (311.0–342.5) | 36 | -37.8 | 40 | 21945.9 (19521.6–24782.4) | 39 | 16626.0 (14215.3–19288.5) | 35 | -24.2 | 25 |
| Kagoshima | 535.7 (523.8–549.1) | 30 | 320.0 (307.8–333.6) | 32 | -40.3 | 25 | 21908.8 (19354.5–24868.7) | 36 | 16585.1 (14107.1–19347.0) | 34 | -24.3 | 22 |
| Okinawa   | 457.8 (447.0–468.4) | 1  | 324.5 (310.3–337.2) | 34 | -29.1 | 47 | 21110.4 (18562.9–23998.1) | 14 | 16967.8 (14550.1–19789.5) | 44 | -19.6 | 47 |

UI: uncertainty interval. Prefectures are ordered according to their ISO codes. The rankings are assigned among the 47 prefectures, with values allocated in ascending order from the lowest to the highest.



**Table S6: COVID-19 mortality rate, percentage of total deaths, and COVID-19 age-standardised mortality rate in Japan and 47 prefectures, 2020 and 2021, for both sexes**

| Prefecture   | 2020                                |                                      |                                                      | 2021                                |                                      |                                                      |
|--------------|-------------------------------------|--------------------------------------|------------------------------------------------------|-------------------------------------|--------------------------------------|------------------------------------------------------|
|              | Mortality rate per 100,000 (95% UI) | Percent of total deaths (%) (95% UI) | Age-standardised mortality rate per 100,000 (95% UI) | Mortality rate per 100,000 (95% UI) | Percent of total deaths (%) (95% UI) | Age-standardised mortality rate per 100,000 (95% UI) |
| <b>Japan</b> | 2.7 (2.4–3.1)                       | 0.3 (0.2–0.3)                        | 0.8 (0.7–0.9)                                        | 11.7 (9.8–13.9)                     | 1.0 (0.9–1.2)                        | 3.0 (2.5–3.7)                                        |
| Hokkaido     | 8.3 (3.8–13.1)                      | 0.7 (0.3–1.1)                        | 2.2 (1.0–3.4)                                        | 19.9 (7.1–39.7)                     | 1.5 (0.6–3.1)                        | 4.7 (1.5–9.6)                                        |
| Aomori       | 0.6 (0.2–1.1)                       | 0.0 (0.0–0.1)                        | 0.2 (0.1–0.3)                                        | 2.3 (0.7–4.6)                       | 0.2 (0.0–0.3)                        | 0.5 (0.2–1.1)                                        |
| Iwate        | 2.0 (0.9–3.4)                       | 0.1 (0.1–0.2)                        | 0.5 (0.2–0.8)                                        | 2.2 (0.6–4.4)                       | 0.1 (0.0–0.3)                        | 0.5 (0.1–1.0)                                        |
| Miyagi       | 0.7 (0.3–1.2)                       | 0.1 (0.0–0.1)                        | 0.2 (0.1–0.3)                                        | 3.9 (1.2–8.2)                       | 0.4 (0.1–0.7)                        | 1.1 (0.3–2.4)                                        |
| Akita        | 0.1 (0.0–0.2)                       | 0.0 (0.0–0.0)                        | 0.0 (0.0–0.0)                                        | 11.5 (1.5–42.3)                     | 0.7 (0.1–2.5)                        | 2.0 (0.2–7.8)                                        |
| Yamagata     | 0.6 (0.2–1.0)                       | 0.0 (0.0–0.1)                        | 0.1 (0.1–0.2)                                        | 5.0 (1.8–9.4)                       | 0.3 (0.1–0.6)                        | 0.9 (0.2–1.9)                                        |
| Fukushima    | 1.2 (0.6–2.2)                       | 0.1 (0.0–0.2)                        | 0.3 (0.1–0.6)                                        | 7.8 (2.6–15.2)                      | 0.6 (0.2–1.1)                        | 1.6 (0.5–3.3)                                        |
| Ibaraki      | 1.2 (0.6–2.0)                       | 0.1 (0.1–0.2)                        | 0.4 (0.2–0.6)                                        | 5.8 (1.3–11.6)                      | 0.5 (0.1–1.0)                        | 1.5 (0.3–3.2)                                        |
| Tochigi      | 0.3 (0.1–0.5)                       | 0.0 (0.0–0.0)                        | 0.1 (0.0–0.2)                                        | 5.2 (1.8–9.9)                       | 0.4 (0.2–0.8)                        | 1.4 (0.5–2.8)                                        |
| Gunma        | 2.3 (1.0–3.8)                       | 0.2 (0.1–0.3)                        | 0.6 (0.2–1.0)                                        | 12.4 (2.9–36.6)                     | 1.0 (0.2–2.9)                        | 3.0 (0.7–8.9)                                        |
| Saitama      | 2.8 (1.2–4.4)                       | 0.3 (0.1–0.5)                        | 0.9 (0.4–1.4)                                        | 11.8 (3.9–28.0)                     | 1.2 (0.4–2.8)                        | 3.4 (1.0–8.3)                                        |
| Chiba        | 1.8 (0.8–3.0)                       | 0.2 (0.1–0.3)                        | 0.6 (0.3–1.0)                                        | 13.1 (4.6–22.4)                     | 1.3 (0.4–2.2)                        | 3.5 (1.1–6.1)                                        |
| Tokyo        | 4.3 (2.4–6.2)                       | 0.5 (0.3–0.7)                        | 1.5 (0.8–2.2)                                        | 15.9 (7.1–25.4)                     | 1.8 (0.8–2.9)                        | 5.1 (2.1–8.4)                                        |
| Kanagawa     | 2.9 (1.4–4.5)                       | 0.3 (0.2–0.5)                        | 1.0 (0.5–1.5)                                        | 10.2 (3.1–21.3)                     | 1.1 (0.3–2.2)                        | 3.1 (0.9–6.5)                                        |
| Niigata      | 0.1 (0.0–0.2)                       | 0.0 (0.0–0.0)                        | 0.0 (0.0–0.1)                                        | 5.9 (0.7–24.1)                      | 0.4 (0.1–1.7)                        | 1.1 (0.1–5.0)                                        |
| Toyama       | 3.1 (1.5–5.1)                       | 0.3 (0.1–0.4)                        | 0.7 (0.3–1.1)                                        | 14.9 (1.9–42.5)                     | 1.1 (0.1–3.2)                        | 3.0 (0.4–8.7)                                        |
| Ishikawa     | 5.9 (3.3–8.8)                       | 0.5 (0.3–0.8)                        | 1.3 (0.6–2.0)                                        | 16.6 (6.6–39.4)                     | 1.4 (0.6–3.3)                        | 3.4 (1.3–8.6)                                        |
| Fukui        | 2.0 (0.9–3.3)                       | 0.2 (0.1–0.3)                        | 0.5 (0.2–0.8)                                        | 13.8 (2.3–42.8)                     | 1.1 (0.2–3.3)                        | 3.0 (0.4–9.3)                                        |
| Yamanashi    | 1.4 (0.7–2.4)                       | 0.1 (0.1–0.2)                        | 0.3 (0.2–0.6)                                        | 2.4 (0.9–4.3)                       | 0.2 (0.1–0.3)                        | 0.6 (0.2–1.1)                                        |
| Nagano       | 0.7 (0.3–1.2)                       | 0.1 (0.0–0.1)                        | 0.2 (0.1–0.3)                                        | 3.6 (1.1–7.4)                       | 0.3 (0.1–0.6)                        | 0.9 (0.2–1.8)                                        |
| Gifu         | 1.7 (0.7–2.9)                       | 0.1 (0.1–0.3)                        | 0.5 (0.2–0.8)                                        | 8.4 (2.7–18.4)                      | 0.7 (0.2–1.5)                        | 1.7 (0.5–3.9)                                        |
| Shizuoka     | 1.1 (0.5–1.9)                       | 0.1 (0.0–0.2)                        | 0.3 (0.1–0.5)                                        | 4.2 (1.0–8.3)                       | 0.4 (0.1–0.7)                        | 1.1 (0.3–2.2)                                        |
| Aichi        | 2.7 (1.4–4.3)                       | 0.3 (0.2–0.5)                        | 0.9 (0.4–1.4)                                        | 11.1 (4.3–20.5)                     | 1.1 (0.4–2.1)                        | 3.1 (1.1–6.0)                                        |
| Mie          | 1.0 (0.5–1.8)                       | 0.1 (0.0–0.2)                        | 0.3 (0.1–0.5)                                        | 9.8 (2.9–28.4)                      | 0.8 (0.2–2.3)                        | 2.2 (0.6–6.6)                                        |
| Shiga        | 0.9 (0.4–1.4)                       | 0.1 (0.0–0.1)                        | 0.3 (0.1–0.5)                                        | 6.1 (3.0–12.8)                      | 0.6 (0.3–1.3)                        | 1.5 (0.7–3.2)                                        |
| Kyoto        | 1.8 (0.7–3.1)                       | 0.2 (0.1–0.3)                        | 0.5 (0.2–0.9)                                        | 11.1 (3.7–26.9)                     | 1.0 (0.3–2.5)                        | 2.5 (0.7–6.1)                                        |
| Osaka        | 6.3 (3.3–9.3)                       | 0.6 (0.3–0.9)                        | 1.9 (1.0–2.8)                                        | 24.1 (11.0–39.5)                    | 2.2 (1.0–3.7)                        | 6.7 (2.9–11.5)                                       |
| Hyogo        | 3.8 (2.0–5.8)                       | 0.4 (0.2–0.5)                        | 0.9 (0.4–1.4)                                        | 18.3 (5.9–38.5)                     | 1.7 (0.5–3.4)                        | 4.8 (1.3–10.5)                                       |
| Nara         | 1.8 (0.7–3.3)                       | 0.2 (0.1–0.3)                        | 0.5 (0.2–0.9)                                        | 8.6 (3.1–15.8)                      | 0.7 (0.3–1.3)                        | 2.2 (0.8–4.2)                                        |
| Wakayama     | 0.8 (0.4–1.5)                       | 0.1 (0.0–0.1)                        | 0.2 (0.1–0.4)                                        | 5.5 (1.8–10.8)                      | 0.4 (0.1–0.7)                        | 1.2 (0.4–2.5)                                        |
| Tottori      | 0.0 (0.0–0.0)                       | 0.0 (0.0–0.0)                        | 0.0 (0.0–0.0)                                        | 0.9 (0.3–1.7)                       | 0.1 (0.0–0.1)                        | 0.2 (0.1–0.4)                                        |
| Shimane      | 0.0 (0.0–0.0)                       | 0.0 (0.0–0.0)                        | 0.0 (0.0–0.0)                                        | 10.2 (0.6–41.6)                     | 0.7 (0.0–2.9)                        | 1.8 (0.1–7.9)                                        |
| Okayama      | 0.7 (0.3–1.2)                       | 0.1 (0.0–0.1)                        | 0.2 (0.1–0.3)                                        | 5.9 (2.7–10.3)                      | 0.5 (0.2–0.9)                        | 1.4 (0.6–2.6)                                        |
| Hiroshima    | 1.0 (0.4–1.9)                       | 0.1 (0.0–0.2)                        | 0.3 (0.1–0.5)                                        | 5.3 (1.5–11.0)                      | 0.5 (0.1–1.0)                        | 1.4 (0.4–2.9)                                        |
| Yamaguchi    | 0.2 (0.1–0.4)                       | 0.0 (0.0–0.0)                        | 0.1 (0.0–0.1)                                        | 7.4 (1.6–22.8)                      | 0.5 (0.1–1.6)                        | 1.3 (0.2–4.2)                                        |
| Tokushima    | 1.3 (0.7–2.0)                       | 0.1 (0.1–0.2)                        | 0.3 (0.2–0.5)                                        | 20.1 (6.4–50.4)                     | 1.3 (0.4–3.3)                        | 3.7 (1.0–9.7)                                        |
| Kagawa       | 0.4 (0.2–0.6)                       | 0.0 (0.0–0.0)                        | 0.1 (0.0–0.2)                                        | 3.9 (1.7–7.1)                       | 0.3 (0.1–0.5)                        | 0.8 (0.3–1.6)                                        |
| Ehime        | 1.0 (0.4–1.8)                       | 0.1 (0.0–0.1)                        | 0.2 (0.1–0.4)                                        | 9.8 (2.3–30.5)                      | 0.7 (0.2–2.2)                        | 1.9 (0.4–6.2)                                        |
| Kochi        | 1.0 (0.4–1.7)                       | 0.1 (0.0–0.1)                        | 0.2 (0.1–0.4)                                        | 6.6 (1.5–24.5)                      | 0.4 (0.1–1.6)                        | 1.1 (0.2–4.3)                                        |
| Fukuoka      | 2.3 (1.0–3.8)                       | 0.2 (0.1–0.4)                        | 0.7 (0.3–1.1)                                        | 9.8 (3.4–20.9)                      | 0.9 (0.3–1.9)                        | 2.4 (0.7–5.3)                                        |
| Saga         | 0.4 (0.2–0.7)                       | 0.0 (0.0–0.1)                        | 0.1 (0.1–0.2)                                        | 3.0 (0.9–6.4)                       | 0.2 (0.1–0.5)                        | 0.7 (0.2–1.6)                                        |
| Nagasaki     | 0.3 (0.1–0.5)                       | 0.0 (0.0–0.0)                        | 0.1 (0.0–0.1)                                        | 11.3 (2.4–36.8)                     | 0.8 (0.2–2.7)                        | 2.3 (0.4–7.8)                                        |
| Kumamoto     | 0.9 (0.4–1.6)                       | 0.1 (0.0–0.1)                        | 0.2 (0.1–0.4)                                        | 7.3 (3.0–13.1)                      | 0.6 (0.2–1.0)                        | 1.5 (0.5–2.8)                                        |
| Oita         | 0.7 (0.3–1.2)                       | 0.1 (0.0–0.1)                        | 0.2 (0.1–0.3)                                        | 6.0 (1.9–18.2)                      | 0.5 (0.1–1.4)                        | 1.5 (0.5–4.6)                                        |
| Miyazaki     | 2.7 (0.1–17.2)                      | 0.2 (0.0–1.4)                        | 0.6 (0.0–4.1)                                        | 8.7 (1.6–30.3)                      | 0.6 (0.1–2.2)                        | 1.8 (0.3–6.6)                                        |
| Kagoshima    | 0.9 (0.4–1.5)                       | 0.1 (0.0–0.1)                        | 0.2 (0.1–0.4)                                        | 3.0 (1.2–5.7)                       | 0.2 (0.1–0.4)                        | 0.7 (0.3–1.4)                                        |
| Okinawa      | 5.5 (2.6–8.9)                       | 0.7 (0.3–1.1)                        | 2.0 (0.9–3.3)                                        | 24.7 (10.6–45.7)                    | 2.8 (1.2–5.1)                        | 8.8 (3.6–16.9)                                       |

UI: uncertainty interval. Prefectures are ordered according to their ISO codes.

**Table S7: COVID-19 DALY rate, percentage of total DALYs, and COVID-19 age-standardised DALY rate in Japan and 47 prefectures, 2020 and 2021, for both sexes**

|              | 2020                                 |                                          |                                                          | 2021                                 |                                           |                                                          |
|--------------|--------------------------------------|------------------------------------------|----------------------------------------------------------|--------------------------------------|-------------------------------------------|----------------------------------------------------------|
| Prefecture   | DALY rate<br>per 100,000<br>(95% UI) | Percent of total<br>DALY (%)<br>(95% UI) | Age-standardised<br>DALY rate<br>per 100,000<br>(95% UI) | DALY rate<br>per 100,000<br>(95% UI) | Percent of total<br>DALYs (%)<br>(95% UI) | Age-standardised<br>DALY rate<br>per 100,000<br>(95% UI) |
| <b>Japan</b> | 45.1 (40.0–51.9)                     | 0.2 (0.1–0.2)                            | 19.2 (16.5–23.4)                                         | 190.2 (155.6–235.0)                  | 0.6 (0.5–0.8)                             | 79.4 (59.8–113.0)                                        |
| Hokkaido     | 130.4 (62.2–202.3)                   | 0.4 (0.2–0.6)                            | 48.1 (24.2–75.1)                                         | 306.9 (119.9–611.0)                  | 0.9 (0.4–1.8)                             | 112.5 (47.7–214.1)                                       |
| Aomori       | 13.4 (6.1–22.0)                      | 0.0 (0.0–0.1)                            | 6.8 (3.5–11.8)                                           | 61.9 (30.9–119.0)                    | 0.2 (0.1–0.3)                             | 35.9 (15.9–73.4)                                         |
| Iwate        | 33.1 (16.6–53.6)                     | 0.1 (0.0–0.2)                            | 13.6 (7.5–21.5)                                          | 60.2 (29.9–104.4)                    | 0.2 (0.1–0.3)                             | 34.5 (16.3–68.1)                                         |
| Miyagi       | 14.4 (7.3–23.3)                      | 0.0 (0.0–0.1)                            | 7.3 (3.8–12.3)                                           | 86.4 (38.8–154.7)                    | 0.3 (0.1–0.5)                             | 44.9 (19.7–81.2)                                         |
| Akita        | 5.7 (3.0–10.1)                       | 0.0 (0.0–0.0)                            | 3.7 (1.7–7.7)                                            | 177.3 (40.2–576.2)                   | 0.5 (0.1–1.5)                             | 62.2 (19.0–164.7)                                        |
| Yamagata     | 11.7 (6.2–19.2)                      | 0.0 (0.0–0.1)                            | 6.2 (3.3–10.6)                                           | 90.3 (41.6–157.5)                    | 0.3 (0.1–0.5)                             | 43.1 (19.6–81.9)                                         |
| Fukushima    | 22.8 (12.1–37.4)                     | 0.1 (0.0–0.1)                            | 10.2 (5.7–16.6)                                          | 127.7 (54.2–228.4)                   | 0.4 (0.2–0.7)                             | 54.5 (24.9–96.2)                                         |
| Ibaraki      | 23.6 (12.7–36.2)                     | 0.1 (0.0–0.1)                            | 11.8 (6.9–17.6)                                          | 111.0 (35.2–197.3)                   | 0.3 (0.1–0.6)                             | 53.0 (21.1–99.3)                                         |
| Tochigi      | 8.5 (4.5–14.1)                       | 0.0 (0.0–0.0)                            | 5.1 (2.6–9.3)                                            | 104.5 (48.4–183.0)                   | 0.3 (0.2–0.6)                             | 51.0 (24.4–90.2)                                         |
| Gunma        | 35.4 (16.8–59.7)                     | 0.1 (0.1–0.2)                            | 15.0 (7.7–24.2)                                          | 195.8 (61.4–529.3)                   | 0.6 (0.2–1.6)                             | 82.2 (30.5–194.5)                                        |
| Saitama      | 47.0 (23.0–73.5)                     | 0.2 (0.1–0.3)                            | 21.1 (10.6–32.4)                                         | 195.3 (76.2–438.0)                   | 0.7 (0.3–1.5)                             | 81.1 (34.7–179.8)                                        |
| Chiba        | 33.6 (17.1–52.0)                     | 0.1 (0.1–0.2)                            | 14.8 (7.5–23.6)                                          | 204.1 (82.9–344.5)                   | 0.7 (0.3–1.2)                             | 80.0 (36.0–134.4)                                        |
| Tokyo        | 70.4 (40.4–102.9)                    | 0.3 (0.2–0.4)                            | 32.2 (19.0–47.9)                                         | 256.2 (117.8–407.6)                  | 1.0 (0.4–1.5)                             | 117.3 (53.6–187.0)                                       |
| Kanagawa     | 52.9 (28.8–79.9)                     | 0.2 (0.1–0.3)                            | 24.4 (13.8–36.1)                                         | 178.8 (65.5–340.2)                   | 0.6 (0.2–1.2)                             | 81.6 (33.2–153.2)                                        |
| Niigata      | 5.9 (3.1–10.6)                       | 0.0 (0.0–0.0)                            | 3.9 (1.8–8.1)                                            | 100.0 (31.0–349.1)                   | 0.3 (0.1–1.0)                             | 42.8 (14.9–108.2)                                        |
| Toyama       | 44.8 (22.9–73.1)                     | 0.1 (0.1–0.2)                            | 15.8 (8.3–24.8)                                          | 218.0 (47.3–568.9)                   | 0.7 (0.1–1.7)                             | 77.7 (22.3–187.5)                                        |
| Ishikawa     | 78.9 (40.4–118.6)                    | 0.3 (0.1–0.4)                            | 27.8 (14.0–43.7)                                         | 229.9 (97.8–526.4)                   | 0.7 (0.3–1.7)                             | 80.5 (35.6–168.0)                                        |
| Fukui        | 31.7 (16.0–51.6)                     | 0.1 (0.1–0.2)                            | 13.6 (7.7–21.2)                                          | 205.9 (51.0–576.0)                   | 0.6 (0.2–1.9)                             | 79.3 (24.8–194.8)                                        |
| Yamanashi    | 23.5 (12.4–40.2)                     | 0.1 (0.0–0.1)                            | 11.0 (6.4–18.1)                                          | 64.5 (30.5–112.7)                    | 0.2 (0.1–0.3)                             | 36.7 (17.8–71.9)                                         |
| Nagano       | 15.3 (8.2–24.0)                      | 0.0 (0.0–0.1)                            | 7.5 (4.4–12.5)                                           | 81.8 (34.9–146.6)                    | 0.3 (0.1–0.5)                             | 41.8 (19.1–79.2)                                         |
| Gifu         | 28.5 (13.3–46.6)                     | 0.1 (0.0–0.2)                            | 13.6 (7.6–21.0)                                          | 127.3 (55.1–255.8)                   | 0.4 (0.2–0.8)                             | 48.6 (22.5–97.0)                                         |
| Shizuoka     | 20.8 (9.9–33.4)                      | 0.1 (0.0–0.1)                            | 9.9 (5.2–15.6)                                           | 88.7 (37.2–162.7)                    | 0.3 (0.1–0.5)                             | 44.3 (19.7–86.8)                                         |
| Aichi        | 46.9 (25.2–72.4)                     | 0.2 (0.1–0.3)                            | 21.7 (12.1–32.8)                                         | 174.7 (75.5–316.0)                   | 0.6 (0.3–1.1)                             | 74.3 (32.3–131.3)                                        |
| Mie          | 19.1 (10.3–31.2)                     | 0.1 (0.0–0.1)                            | 9.3 (5.2–15.3)                                           | 155.8 (57.3–398.9)                   | 0.5 (0.2–1.2)                             | 63.7 (27.7–134.0)                                        |
| Shiga        | 16.9 (8.9–26.1)                      | 0.1 (0.0–0.1)                            | 8.9 (5.0–14.0)                                           | 101.5 (52.8–186.8)                   | 0.4 (0.2–0.7)                             | 50.6 (26.5–92.4)                                         |
| Kyoto        | 31.5 (14.3–52.1)                     | 0.1 (0.1–0.2)                            | 14.2 (7.3–23.5)                                          | 173.9 (65.3–370.8)                   | 0.6 (0.2–1.2)                             | 69.7 (29.5–137.9)                                        |
| Osaka        | 99.4 (52.3–146.2)                    | 0.3 (0.2–0.5)                            | 40.7 (21.7–59.7)                                         | 370.4 (169.6–616.5)                  | 1.2 (0.5–2.1)                             | 145.2 (65.2–245.0)                                       |
| Hyogo        | 50.3 (26.9–77.8)                     | 0.2 (0.1–0.3)                            | 16.5 (9.2–26.1)                                          | 290.8 (103.1–601.3)                  | 1.0 (0.3–1.9)                             | 117.0 (45.8–234.5)                                       |
| Nara         | 31.8 (15.2–54.7)                     | 0.1 (0.1–0.2)                            | 14.4 (8.2–23.3)                                          | 154.4 (66.9–267.0)                   | 0.5 (0.2–0.9)                             | 68.6 (33.3–115.4)                                        |
| Wakayama     | 15.7 (7.8–26.3)                      | 0.0 (0.0–0.1)                            | 7.3 (3.9–12.4)                                           | 103.6 (45.0–200.8)                   | 0.3 (0.1–0.6)                             | 47.8 (21.9–91.7)                                         |
| Tottori      | 3.8 (1.6–8.6)                        | 0.0 (0.0–0.0)                            | 3.1 (1.2–7.5)                                            | 41.8 (21.6–84.3)                     | 0.1 (0.1–0.2)                             | 28.1 (12.2–64.9)                                         |
| Shimane      | 3.9 (1.7–8.5)                        | 0.0 (0.0–0.0)                            | 3.2 (1.2–7.5)                                            | 157.5 (25.3–566.9)                   | 0.5 (0.1–1.5)                             | 60.4 (13.6–176.8)                                        |
| Okayama      | 13.6 (6.8–22.1)                      | 0.0 (0.0–0.1)                            | 6.8 (3.7–11.9)                                           | 110.7 (57.2–185.3)                   | 0.4 (0.2–0.6)                             | 52.8 (27.6–93.4)                                         |
| Hiroshima    | 19.3 (9.0–32.6)                      | 0.1 (0.0–0.1)                            | 9.2 (4.6–14.9)                                           | 104.6 (39.7–195.4)                   | 0.3 (0.1–0.6)                             | 50.7 (20.6–89.5)                                         |
| Yamaguchi    | 7.4 (3.8–12.4)                       | 0.0 (0.0–0.0)                            | 4.6 (2.3–8.8)                                            | 119.1 (44.3–313.5)                   | 0.3 (0.1–0.9)                             | 47.1 (20.5–105.0)                                        |
| Tokushima    | 21.5 (12.7–34.0)                     | 0.1 (0.0–0.1)                            | 9.7 (5.7–15.1)                                           | 274.1 (99.1–672.9)                   | 0.8 (0.3–1.8)                             | 91.1 (34.9–209.4)                                        |
| Kagawa       | 9.1 (5.3–14.4)                       | 0.0 (0.0–0.0)                            | 5.0 (2.7–9.2)                                            | 80.6 (40.2–142.4)                    | 0.2 (0.1–0.4)                             | 40.3 (19.3–78.7)                                         |
| Ehime        | 17.7 (8.6–29.5)                      | 0.1 (0.0–0.1)                            | 7.9 (4.0–13.2)                                           | 150.2 (47.3–424.3)                   | 0.4 (0.1–1.2)                             | 58.0 (21.4–138.3)                                        |
| Kochi        | 19.2 (10.5–29.8)                     | 0.1 (0.0–0.1)                            | 8.6 (5.0–13.6)                                           | 109.2 (40.5–324.6)                   | 0.3 (0.1–0.9)                             | 43.6 (15.9–99.2)                                         |
| Fukuoka      | 37.8 (18.0–60.4)                     | 0.1 (0.1–0.2)                            | 16.9 (8.8–26.5)                                          | 154.1 (63.1–311.8)                   | 0.5 (0.2–1.0)                             | 63.0 (27.3–117.9)                                        |
| Saga         | 10.2 (5.7–15.6)                      | 0.0 (0.0–0.1)                            | 5.4 (2.9–9.4)                                            | 71.5 (34.7–130.9)                    | 0.2 (0.1–0.4)                             | 39.7 (19.8–77.3)                                         |
| Nagasaki     | 8.2 (4.5–13.8)                       | 0.0 (0.0–0.0)                            | 4.9 (2.5–9.2)                                            | 175.6 (51.6–523.0)                   | 0.5 (0.2–1.5)                             | 68.1 (25.5–177.6)                                        |
| Kumamoto     | 16.9 (8.5–28.3)                      | 0.1 (0.0–0.1)                            | 8.1 (4.4–13.4)                                           | 120.4 (57.2–204.0)                   | 0.4 (0.2–0.6)                             | 50.2 (23.6–89.8)                                         |
| Oita         | 13.3 (7.0–22.3)                      | 0.0 (0.0–0.1)                            | 6.5 (3.6–11.7)                                           | 118.8 (50.3–310.1)                   | 0.4 (0.2–0.9)                             | 58.4 (27.5–127.5)                                        |
| Miyazaki     | 40.8 (4.3–237.6)                     | 0.1 (0.0–0.8)                            | 17.5 (2.6–89.5)                                          | 142.4 (43.8–449.1)                   | 0.4 (0.1–1.3)                             | 59.8 (21.2–165.8)                                        |
| Kagoshima    | 16.9 (9.2–27.6)                      | 0.1 (0.0–0.1)                            | 8.3 (4.9–13.7)                                           | 72.7 (36.5–128.9)                    | 0.2 (0.1–0.4)                             | 39.7 (19.2–80.1)                                         |
| Okinawa      | 92.7 (45.0–147.9)                    | 0.4 (0.2–0.5)                            | 45.5 (22.1–72.2)                                         | 425.3 (182.6–783.2)                  | 1.6 (0.7–2.8)                             | 209.0 (89.6–375.9)                                       |

UI: uncertainty interval. Prefectures are ordered according to their ISO codes.
